# Supplementary material for: Bacillus-Mediated Transcriptional and Metabolic Reprogramming Mitigates Root Rot in Coptis chinensis
Source: Research Square preprint supplement (doi:10.21203/rs.3.rs-8146810/v1), 2026-01-23
Supplement: Supplementary file 1 [file 16fc92e96035900bc3d7e5ff.docx]

***Bacillus*-Mediated Transcriptional and Metabolic Reprogramming Mitigates Root Rot in *Coptis chinensis***

Na Li1, 3, Hailang Liao2, Chi Zhang1, 3, Feifei Xu1, 3, WenJia Ke1, 3, Yang Xiao1, 3, JiJing Dong5, BinJie Xu4*, Tao Zhou1, 3*, YunTong Ma1, 3*

1State Key Laboratory of Southwestern Chinese Medicine Resources, Chengdu University of Traditional Chinese Medicine, Chengdu, Sichuan 611137, China.

2Industrial Crop Research Institute, Sichuan Academy of Agricultural Sciences, Chengdu 610300, Sichuan, China.

3College of Pharmacy, Chengdu University of Traditional Chinese Medicine, Chengdu, Sichuan 611137, China

4Innovative Institute of Chinese Medicine and Pharmacy, Chengdu University of Traditional Chinese Medicine, Chengdu, Sichuan 611137, China.

5Traditional Chinese Medicine Hospital of Ya’an, Sichuan, China.

***Corresponding author:**

BinJie Xu (Innovative Institute of Chinese Medicine and Pharmacy, Chengdu University of Traditional Chinese Medicine, Chengdu, Sichuan 611137, China. Email: binjiexu@outlook.com)

Tao Zhou (College of Pharmacy, Chengdu University of Traditional Chinese Medicine, Chengdu, Sichuan 611137, China. Email: 364462907@qq.com)

YunTong Ma (College of Pharmacy, Chengdu University of Traditional Chinese Medicine, Chengdu, Sichuan 611137, China. E-mail: mayuntong@cdutcm.edu.cn)

**Figure captions**

**Supplementary Fig. S1.** In vitro compatibility test of 4 Bacillus: (A) *B. mycoides* vs *B. pseudomycoides*. (B) *B. mycoides* vs *B. subtilis*. (C) *B. mycoides* vs *B. velezensis*. (D) *B. velezensis* vs *B. pseudomycoides*. (E) *B. velezensis* vs *B. subtilis*. (F) *B. subtilis* vs *B. pseudomycoides*. Scale bar, 1cm.

**Supplementary Fig. S2.** PCA statistical analysis of transcriptome of *Coptis chinensis* roots under different treatments.

**Supplementary Fig. S3.** Pathways related to disease resistance and the expression levels of key genes. (A) MAPK signaling pathway and plant-pathogen interaction pathway. (B) Plant hormone signal transduction pathway.


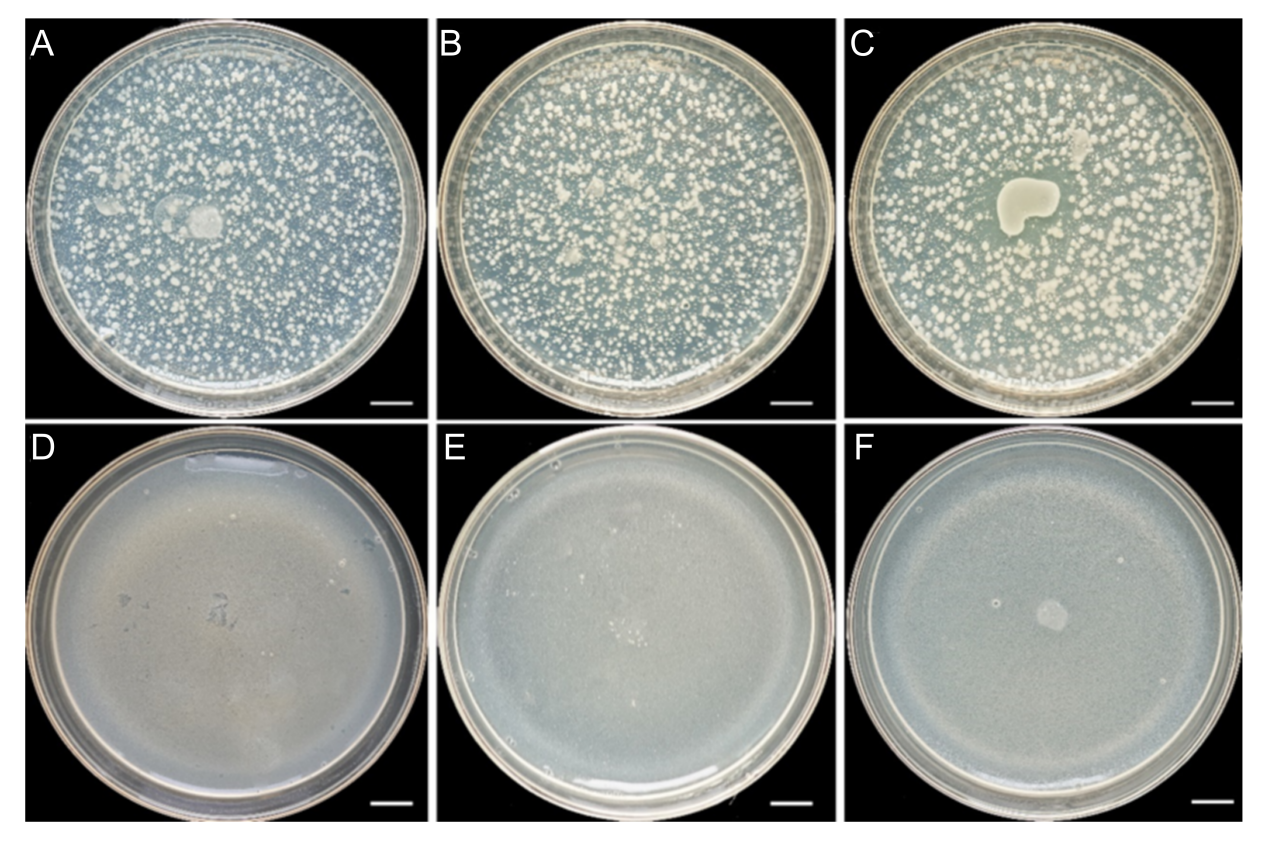


**Supplementary Fig. S1.** In vitro compatibility test of 4 *Bacillus*. (A) *B. mycoides* vs *B. pseudomycoides*. (B) *B. mycoides* vs *B. subtilis*. (C) *B. mycoides* vs *B. velezensis*. (D) *B. velezensis* vs *B. pseudomycoides*. (E) *B. velezensis* vs *B. subtilis*. (F) *B. subtilis* vs *B. pseudomycoides*. Scale bar, 1cm.


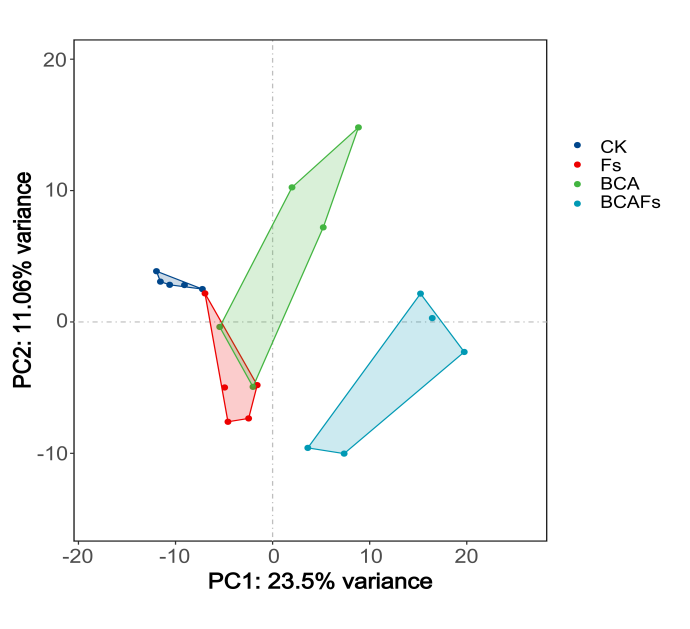


**Supplementary Fig. S2.** PCA statistical analysis of transcriptome of *Coptis chinensis* roots under different treatments.


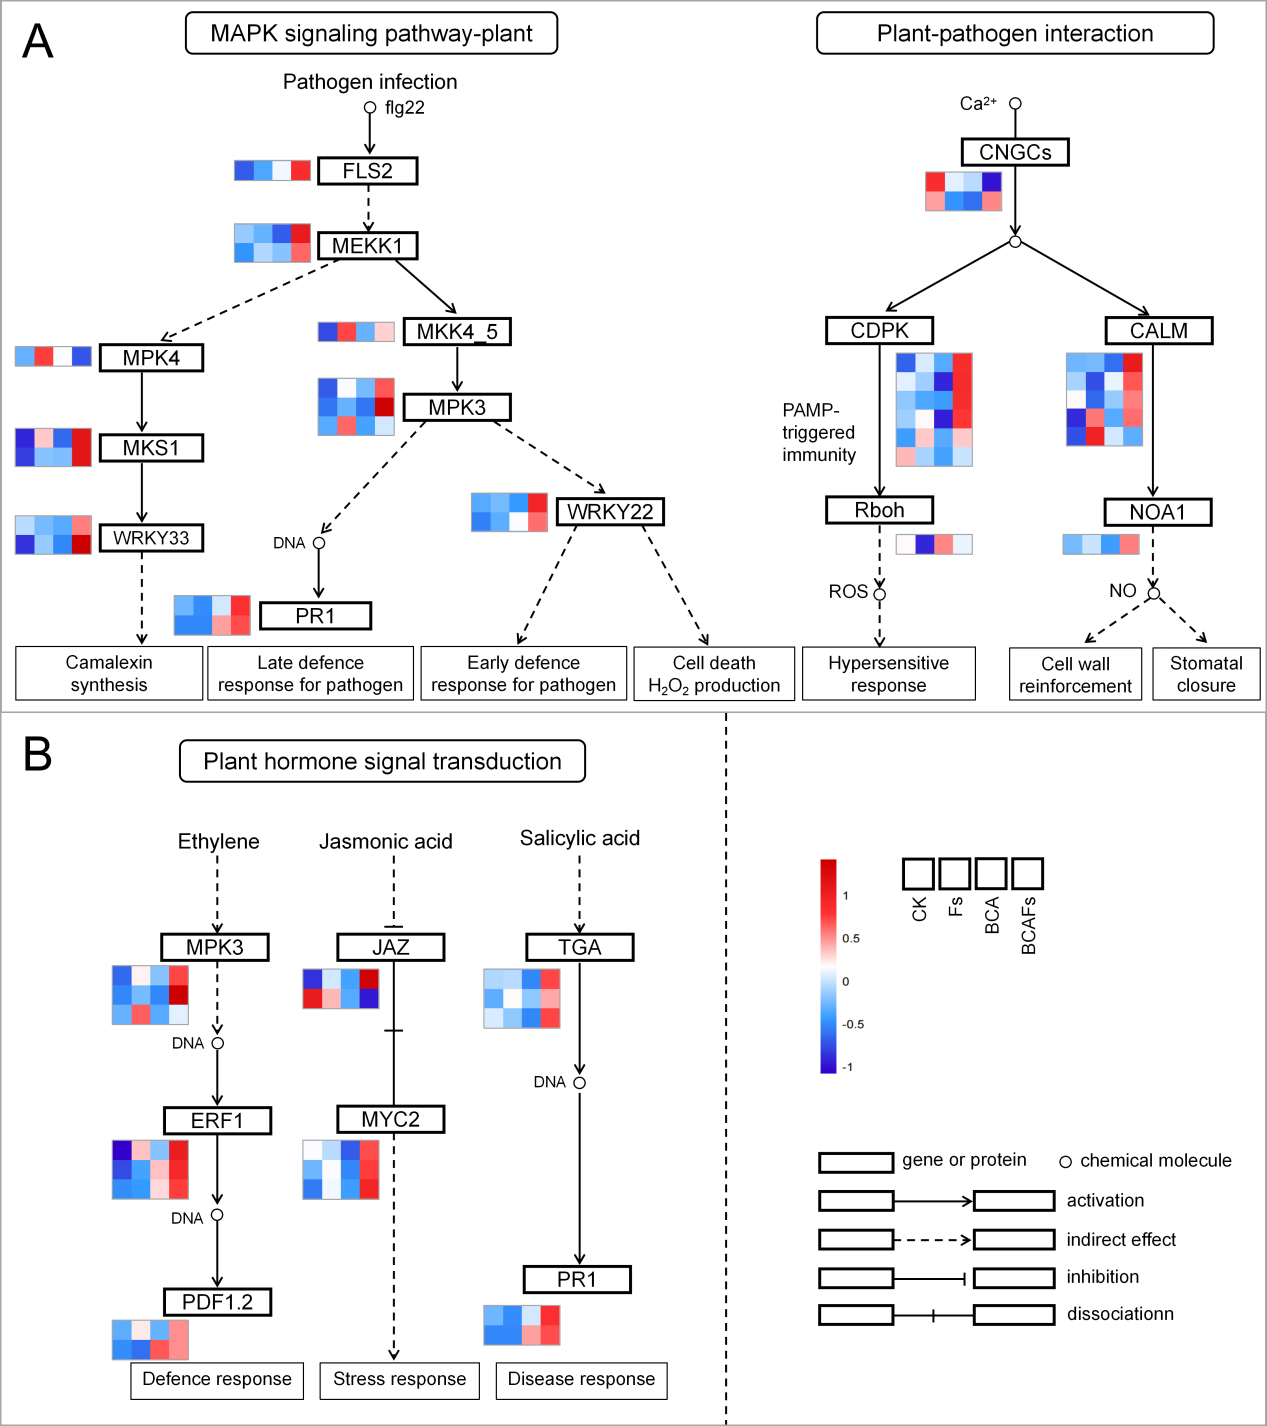


**Supplementary Fig. S3.** Pathways related to disease resistance and the expression levels of key genes. (A) MAPK signaling pathway and plant-pathogen interaction pathway. (B) Plant hormone signal transduction pathway.
