# Supplementary material for: Bacillus-Mediated Transcriptional and Metabolic Reprogramming Mitigates Root Rot in Coptis chinensis
Source: Research Square preprint supplement (doi:10.21203/rs.3.rs-8146810/v1), 2026-01-23
Supplement: Supplementary file 2 [file 6069a7dc4b3484437178eacb.xlsx]

## Sheet: Table. S1
Table S1. Primer sequences used for qRT-PCR
Gene		Primers (5'→3')
GLU	Forward	CCTCCTCACCACGACATT
	Reverse	ATCAGCGTTACCCTTTGC
GS1	Forward	CACAAGGCGAGCCAATCC
	Reverse	CCAGGGTATCCACCAACAGG
GAD	Forward	CCGTCCACTCCACATTCG
	Reverse	TTCCCGTCAAGCATCAGC
NRT2	Forward	ACTGGATGAGCACGATGTTC
	Reverse	AGCAGTGAAGGGAGTAGCC
NiR	Forward	ACCTGCCGAGGAAATGGAAC
	Reverse	ATGAACCCGCCCACCAGAAG
GDH	Forward	ACTGGTCCTCAGACAATGGC
	Reverse	CACTCACGGCAACAATCTTC
18S	Forward	ACGAGTCTATAGCCTTGGCC
	Reverse	TACAAAGGGCAGGGACGTAG
18S was used as reference gene.

## Sheet: Table. S2
Table S2. The disease index of Cc root in four treatment groups.
Disease level	CK	BCA	Fs	BCAFs
0	15	15	12	12
1	0	0	1	3
2	0	0	2	0
3	0	0	0	0
4	0	0	0	0
5	0	0	0	0
Disease Index (%)	0	0	6.66667	4

## Sheet: Table. S3
Table S3. Quality-controlled transcriptome data
sample id	clean reads	total bases	total giga bases	q20 bases	q30 bases	q20 rate	q30 rate	read1 mean length	read2 mean length	gc content
CK1	40955980	5894007815	5.89G	5758585585	5444628872	0.977024	0.923757	144	143	0.41937
CK2	44947290	6470978342	6.47G	6302061511	5937368543	0.973896	0.917538	144	143	0.415708
CK3	55839476	8044029058	8.04G	7838477465	7379801451	0.974447	0.917426	144	143	0.418401
CK4	52241926	7522082138	7.52G	7371833308	7029783357	0.980026	0.934553	144	143	0.418446
CK5	44496648	6385651503	6.39G	6232617472	5890568063	0.976035	0.922469	143	143	0.414546
Fs1	42542974	6118561298	6.12G	5969385299	5638874137	0.975619	0.921601	143	143	0.416911
Fs2	44382160	6380041966	6.38G	6233633149	5905391785	0.977052	0.925604	143	143	0.4168
Fs3	74075838	10664195302	10.66G	10481291807	10063996095	0.982849	0.943718	144	143	0.416332
Fs4	44463282	6390959912	6.39G	6238054565	5896204847	0.976075	0.922585	143	143	0.41181
Fs5	43171512	6205337692	6.21G	6052448734	5707097512	0.975362	0.919708	143	143	0.410841
BCA1	42079006	6038731853	6.04G	5902471278	5588063812	0.977436	0.92537	143	143	0.413908
BCA2	46093380	6609516631	6.61G	6430496384	6048426398	0.972915	0.915109	143	143	0.415332
BCA3	44145270	6359604153	6.36G	6225814252	5918551281	0.978963	0.930648	144	143	0.421323
BCA4	45325106	6519101214	6.52G	6356667219	5992774342	0.975083	0.919264	144	143	0.420397
BCA5	45916196	6606344681	6.61G	6441987995	6081307138	0.975121	0.920525	143	143	0.420499
BCAFs1	40401024	5815420951	5.82G	5685352658	5378372970	0.977634	0.924847	144	143	0.418379
BCAFs2	43169538	6206037327	6.21G	6065075113	5736198968	0.977286	0.924293	143	143	0.420636
BCAFs3	45828592	6591183771	6.59G	6445118470	6104985204	0.977839	0.926235	144	143	0.415262
BCAFs4	45459616	6537127753	6.54G	6382509528	6029266371	0.976348	0.922311	143	143	0.424956
BCAFs5	43044420	6193960743	6.19G	6044431571	5703185864	0.975859	0.920766	144	143	0.420892

## Sheet: Table. S4
Table S4. Differentially expressed genes detected in the comparison between these groups
Pairwise comparison	Gene ID	log2FoldChange	FDR	up/down
Fs vs CK	IFM89_021357	3.08033	2.69246e-08	up
Fs vs CK	IFM89_024341	2.24744	2.69246e-08	up
Fs vs CK	IFM89_032694	2.3894	1.3841e-07	up
Fs vs CK	IFM89_036180	3.69626	5.36313e-07	up
Fs vs CK	MSTRG.467	2.07299	1.29868e-06	up
Fs vs CK	IFM89_032568	2.94107	3.31618e-06	up
Fs vs CK	IFM89_008682	1.89825	3.31618e-06	up
Fs vs CK	IFM89_028964	3.23427	4.47114e-06	up
Fs vs CK	IFM89_021106	2.9028	4.83024e-06	up
Fs vs CK	IFM89_003729	1.40055	8.78774e-06	up
Fs vs CK	IFM89_020257	2.26543	1.04946e-05	up
Fs vs CK	MSTRG.10009	2.36092	1.65048e-05	up
Fs vs CK	MSTRG.3834	5.37568	1.79202e-05	up
Fs vs CK	IFM89_013250	1.9409	1.79202e-05	up
Fs vs CK	IFM89_035082	2.62827	1.96083e-05	up
Fs vs CK	IFM89_022686	2.14169	1.96083e-05	up
Fs vs CK	MSTRG.34294	6.25052	1.98989e-05	up
Fs vs CK	IFM89_018682	2.76954	2.06304e-05	up
Fs vs CK	IFM89_026273	1.89453	2.06304e-05	up
Fs vs CK	IFM89_018591	1.49561	2.06304e-05	up
Fs vs CK	IFM89_001705	2.52948	2.39751e-05	up
Fs vs CK	IFM89_017226	2.45273	2.39751e-05	up
Fs vs CK	IFM89_021778	3.04145	2.90855e-05	up
Fs vs CK	IFM89_024486	7.19676	3.37492e-05	up
Fs vs CK	IFM89_000594	1.70277	3.6036e-05	up
Fs vs CK	MSTRG.25528	1.96631	5.16656e-05	up
Fs vs CK	IFM89_003051	1.79214	5.68726e-05	up
Fs vs CK	IFM89_037681	1.35996	5.88867e-05	up
Fs vs CK	IFM89_032015	1.19354	6.49497e-05	up
Fs vs CK	IFM89_015934	3.84268	6.53986e-05	up
Fs vs CK	IFM89_030494	1.43531	6.53986e-05	up
Fs vs CK	IFM89_037372	2.4979	6.63256e-05	up
Fs vs CK	IFM89_038977	1.68953	7.24778e-05	up
Fs vs CK	IFM89_013292	1.18911	8.29067e-05	up
Fs vs CK	IFM89_026614	2.71672	8.66681e-05	up
Fs vs CK	IFM89_003780	2.1112	8.71789e-05	up
Fs vs CK	IFM89_018228	2.44702	9.61173e-05	up
Fs vs CK	IFM89_010972	2.30466	9.61173e-05	up
Fs vs CK	IFM89_009200	0.943672	0.000107064	up
Fs vs CK	IFM89_003021	2.26346	0.000110102	up
Fs vs CK	IFM89_026609	1.96336	0.000137765	up
Fs vs CK	IFM89_017717	1.00405	0.000146992	up
Fs vs CK	IFM89_037369	2.90643	0.000160431	up
Fs vs CK	IFM89_031936	3.15954	0.000162186	up
Fs vs CK	IFM89_024044	1.45996	0.000162635	up
Fs vs CK	IFM89_035289	1.5937	0.000183491	up
Fs vs CK	MSTRG.2729	1.54032	0.000183491	up
Fs vs CK	IFM89_003307	3.35675	0.000223755	up
Fs vs CK	IFM89_019960	2.45228	0.000233732	up
Fs vs CK	MSTRG.703	7.12516	0.000261928	up
Fs vs CK	MSTRG.12315	6.65588	0.000261928	up
Fs vs CK	IFM89_026005	2.33442	0.000261928	up
Fs vs CK	IFM89_000765	2.14515	0.000261928	up
Fs vs CK	IFM89_002789	7.0247	0.000266782	up
Fs vs CK	IFM89_025161	2.07934	0.000270408	up
Fs vs CK	IFM89_025053	0.93543	0.000270408	up
Fs vs CK	IFM89_020014	2.27087	0.000278295	up
Fs vs CK	IFM89_005129	2.8277	0.000286171	up
Fs vs CK	IFM89_010023	1.60713	0.000286171	up
Fs vs CK	IFM89_035977	1.27084	0.000286171	up
Fs vs CK	IFM89_005941	0.922417	0.000286171	up
Fs vs CK	IFM89_007977	1.33928	0.000286459	up
Fs vs CK	IFM89_005973	1.8638	0.000302083	up
Fs vs CK	IFM89_005960	1.93454	0.000304522	up
Fs vs CK	IFM89_032277	1.73011	0.000304522	up
Fs vs CK	IFM89_016142	1.48764	0.000304522	up
Fs vs CK	IFM89_029164	1.96215	0.000324839	up
Fs vs CK	IFM89_035972	2.35273	0.000328611	up
Fs vs CK	IFM89_028017	5.50924	0.000346983	up
Fs vs CK	IFM89_024369	0.843939	0.000360496	up
Fs vs CK	IFM89_009209	1.46463	0.00036863	up
Fs vs CK	IFM89_011718	3.91035	0.000392102	up
Fs vs CK	IFM89_028134	1.72768	0.000399272	up
Fs vs CK	IFM89_029829	0.494949	0.000413242	up
Fs vs CK	IFM89_028525	0.675507	0.000424058	up
Fs vs CK	IFM89_010034	0.386717	0.000424058	up
Fs vs CK	IFM89_017984	1.21915	0.000451111	up
Fs vs CK	IFM89_001400	1.64671	0.000464561	up
Fs vs CK	IFM89_015689	0.605582	0.000465502	up
Fs vs CK	IFM89_011018	0.633606	0.000479622	up
Fs vs CK	IFM89_018976	1.45252	0.000494348	up
Fs vs CK	IFM89_038678	0.829704	0.000527706	up
Fs vs CK	IFM89_035664	1.46051	0.000541683	up
Fs vs CK	IFM89_033666	2.60463	0.000547242	up
Fs vs CK	IFM89_015184	2.36695	0.000547242	up
Fs vs CK	IFM89_015106	0.791533	0.000613606	up
Fs vs CK	IFM89_015540	1.82693	0.000640278	up
Fs vs CK	IFM89_028830	1.97943	0.000640422	up
Fs vs CK	IFM89_003725	1.82474	0.000665233	up
Fs vs CK	IFM89_011658	4.80117	0.000737139	up
Fs vs CK	IFM89_021652	1.95836	0.000737139	up
Fs vs CK	IFM89_002108	2.27022	0.000788063	up
Fs vs CK	IFM89_031964	1.74442	0.000788063	up
Fs vs CK	IFM89_014946	1.59727	0.000788063	up
Fs vs CK	IFM89_027578	1.56035	0.000788063	up
Fs vs CK	IFM89_035811	0.890672	0.000813917	up
Fs vs CK	IFM89_003726	2.03328	0.000852662	up
Fs vs CK	IFM89_021363	1.22224	0.000852662	up
Fs vs CK	IFM89_008395	2.99617	0.000909541	up
Fs vs CK	IFM89_007117	1.77201	0.000971947	up
Fs vs CK	IFM89_004233	1.03024	0.000971947	up
Fs vs CK	IFM89_026139	0.896558	0.000971947	up
Fs vs CK	IFM89_006193	1.06972	0.0010297	up
Fs vs CK	IFM89_004887	0.850171	0.0010297	up
Fs vs CK	IFM89_013551	0.765391	0.0010297	up
Fs vs CK	IFM89_031826	2.2933	0.00105088	up
Fs vs CK	IFM89_031937	2.75848	0.0010957	up
Fs vs CK	MSTRG.19430	1.24067	0.00110628	up
Fs vs CK	IFM89_012273	0.883515	0.00110854	up
Fs vs CK	IFM89_002743	1.80362	0.00114197	up
Fs vs CK	IFM89_021666	1.87886	0.00117806	up
Fs vs CK	IFM89_038071	2.11098	0.0011982	up
Fs vs CK	MSTRG.16780	3.21652	0.00121717	up
Fs vs CK	IFM89_005972	1.03366	0.00121717	up
Fs vs CK	IFM89_032122	4.68709	0.00123388	up
Fs vs CK	IFM89_032688	0.690824	0.00123709	up
Fs vs CK	IFM89_017382	5.58092	0.0012789	up
Fs vs CK	MSTRG.1676	6.11337	0.00130017	up
Fs vs CK	IFM89_020467	1.13294	0.00130017	up
Fs vs CK	IFM89_014816	0.445427	0.00130017	up
Fs vs CK	MSTRG.31795	7.62615	0.00131656	up
Fs vs CK	IFM89_008291	1.14846	0.00132896	up
Fs vs CK	IFM89_029207	2.34655	0.0014056	up
Fs vs CK	IFM89_006315	1.49691	0.0014056	up
Fs vs CK	IFM89_015765	0.797834	0.0014056	up
Fs vs CK	IFM89_031947	3.28165	0.00140994	up
Fs vs CK	IFM89_029861	0.664003	0.00149874	up
Fs vs CK	IFM89_012799	1.12727	0.00152126	up
Fs vs CK	IFM89_014209	5.58407	0.00161424	up
Fs vs CK	MSTRG.20562	4.36821	0.00161424	up
Fs vs CK	IFM89_002279	1.10217	0.00162069	up
Fs vs CK	IFM89_036995	0.869672	0.00167746	up
Fs vs CK	IFM89_016738	1.0949	0.00184398	up
Fs vs CK	MSTRG.4641	5.4062	0.00187256	up
Fs vs CK	IFM89_030296	2.11317	0.00194587	up
Fs vs CK	IFM89_007979	0.633649	0.00196324	up
Fs vs CK	MSTRG.22986	1.01236	0.00240118	up
Fs vs CK	IFM89_031455	0.839159	0.00240118	up
Fs vs CK	IFM89_024506	4.2947	0.00246997	up
Fs vs CK	IFM89_011522	1.04048	0.00252309	up
Fs vs CK	MSTRG.19229	1.21111	0.00262612	up
Fs vs CK	IFM89_004528	0.82769	0.00262612	up
Fs vs CK	IFM89_035971	1.87692	0.00267073	up
Fs vs CK	IFM89_005287	1.27627	0.00267264	up
Fs vs CK	MSTRG.34046	2.27336	0.00274713	up
Fs vs CK	IFM89_024724	1.36727	0.00275003	up
Fs vs CK	IFM89_034858	4.98636	0.00275015	up
Fs vs CK	IFM89_015558	0.667309	0.00275015	up
Fs vs CK	IFM89_016698	2.0486	0.00275676	up
Fs vs CK	IFM89_015458	1.6411	0.00287086	up
Fs vs CK	IFM89_010385	1.0204	0.00315667	up
Fs vs CK	IFM89_030684	3.13247	0.00319159	up
Fs vs CK	MSTRG.41991	3.33273	0.00322542	up
Fs vs CK	IFM89_008913	1.83512	0.00322542	up
Fs vs CK	IFM89_006194	1.41538	0.00322542	up
Fs vs CK	IFM89_020629	0.491216	0.00331047	up
Fs vs CK	IFM89_004142	1.28271	0.00333378	up
Fs vs CK	MSTRG.12575	1.03883	0.00333416	up
Fs vs CK	IFM89_037163	4.37616	0.00351888	up
Fs vs CK	IFM89_002271	0.94262	0.00354896	up
Fs vs CK	IFM89_016680	3.96426	0.00355715	up
Fs vs CK	IFM89_018685	1.65683	0.00359197	up
Fs vs CK	MSTRG.42822	2.60622	0.00363547	up
Fs vs CK	IFM89_027337	1.89	0.00370021	up
Fs vs CK	IFM89_037376	1.3693	0.00378809	up
Fs vs CK	IFM89_030225	0.408911	0.00404338	up
Fs vs CK	IFM89_021579	2.02287	0.00412848	up
Fs vs CK	IFM89_005077	0.765298	0.00428267	up
Fs vs CK	IFM89_005803	4.20863	0.00437217	up
Fs vs CK	IFM89_022936	1.66797	0.00451321	up
Fs vs CK	IFM89_011904	1.12187	0.00451321	up
Fs vs CK	IFM89_010388	1.00779	0.00451321	up
Fs vs CK	IFM89_006968	0.851042	0.00451321	up
Fs vs CK	IFM89_031813	1.78765	0.00452772	up
Fs vs CK	IFM89_001394	0.902821	0.00460515	up
Fs vs CK	IFM89_028137	1.41493	0.00465268	up
Fs vs CK	IFM89_029666	1.40377	0.00466342	up
Fs vs CK	IFM89_031069	0.943045	0.00466342	up
Fs vs CK	MSTRG.27912	5.09349	0.00474928	up
Fs vs CK	IFM89_010982	0.933538	0.00474928	up
Fs vs CK	IFM89_028473	0.785019	0.00474928	up
Fs vs CK	IFM89_026016	1.44531	0.00480715	up
Fs vs CK	IFM89_028545	3.92461	0.00509502	up
Fs vs CK	IFM89_015167	1.31339	0.00514225	up
Fs vs CK	IFM89_028409	1.21465	0.005184	up
Fs vs CK	IFM89_024725	1.30197	0.00521859	up
Fs vs CK	MSTRG.41022	3.86007	0.00526945	up
Fs vs CK	IFM89_019942	0.866717	0.00527514	up
Fs vs CK	IFM89_036790	3.51428	0.00546205	up
Fs vs CK	IFM89_011375	1.69442	0.00562808	up
Fs vs CK	IFM89_028640	4.01736	0.00573786	up
Fs vs CK	MSTRG.22724	4.44133	0.0061602	up
Fs vs CK	IFM89_026515	5.76626	0.00632666	up
Fs vs CK	MSTRG.37791	2.68111	0.00644739	up
Fs vs CK	IFM89_011276	1.24314	0.00644739	up
Fs vs CK	IFM89_033560	1.50299	0.00648557	up
Fs vs CK	IFM89_017077	1.03698	0.00648557	up
Fs vs CK	IFM89_012528	0.683017	0.0065958	up
Fs vs CK	IFM89_034374	0.662771	0.0066015	up
Fs vs CK	IFM89_023845	1.04193	0.00674757	up
Fs vs CK	MSTRG.34030	1.51641	0.00676144	up
Fs vs CK	IFM89_026413	1.19897	0.00676596	up
Fs vs CK	IFM89_023540	0.901425	0.00677247	up
Fs vs CK	IFM89_034554	1.69791	0.00704229	up
Fs vs CK	MSTRG.714	1.03423	0.00723114	up
Fs vs CK	IFM89_023057	0.495875	0.00728763	up
Fs vs CK	IFM89_028128	2.22767	0.00736396	up
Fs vs CK	MSTRG.22469	5.36073	0.00748994	up
Fs vs CK	MSTRG.42646	1.78952	0.00748994	up
Fs vs CK	IFM89_038295	1.08269	0.00748994	up
Fs vs CK	IFM89_026459	1.39036	0.00750365	up
Fs vs CK	IFM89_014008	1.66134	0.00777181	up
Fs vs CK	IFM89_028517	1.20497	0.00811596	up
Fs vs CK	IFM89_036808	0.719699	0.00811596	up
Fs vs CK	IFM89_004964	1.82222	0.00811797	up
Fs vs CK	IFM89_002111	1.45812	0.00811797	up
Fs vs CK	IFM89_004886	0.596938	0.00811797	up
Fs vs CK	IFM89_014380	1.85538	0.00812208	up
Fs vs CK	IFM89_010391	1.44627	0.00827188	up
Fs vs CK	IFM89_000621	1.04108	0.00831257	up
Fs vs CK	MSTRG.40378	1.33426	0.00832212	up
Fs vs CK	IFM89_014563	1.17668	0.00838211	up
Fs vs CK	IFM89_008630	0.682442	0.00842699	up
Fs vs CK	IFM89_036601	0.820394	0.00852051	up
Fs vs CK	IFM89_003294	5.07715	0.0085842	up
Fs vs CK	IFM89_019018	1.0806	0.0085842	up
Fs vs CK	IFM89_033269	1.61911	0.00859378	up
Fs vs CK	IFM89_017894	5.16976	0.00876103	up
Fs vs CK	IFM89_012319	0.706445	0.00876103	up
Fs vs CK	IFM89_001665	0.380801	0.00876103	up
Fs vs CK	MSTRG.21821	4.75152	0.00881843	up
Fs vs CK	MSTRG.8233	4.72044	0.00881843	up
Fs vs CK	IFM89_039538	0.757143	0.00888416	up
Fs vs CK	IFM89_004303	0.583866	0.00888416	up
Fs vs CK	IFM89_008669	1.52858	0.0089084	up
Fs vs CK	IFM89_008016	0.422342	0.0093135	up
Fs vs CK	MSTRG.15767	3.41606	0.00940498	up
Fs vs CK	MSTRG.25261	4.51906	0.0097394	up
Fs vs CK	IFM89_005737	1.50037	0.0097394	up
Fs vs CK	IFM89_021553	0.673543	0.0100492	up
Fs vs CK	IFM89_025899	1.91982	0.0101115	up
Fs vs CK	MSTRG.4685	4.69795	0.0101884	up
Fs vs CK	IFM89_013808	2.09224	0.0102866	up
Fs vs CK	IFM89_009210	0.591622	0.010305	up
Fs vs CK	IFM89_020564	1.02482	0.0103319	up
Fs vs CK	IFM89_019030	0.529447	0.0103929	up
Fs vs CK	IFM89_010912	0.514122	0.010473	up
Fs vs CK	IFM89_010017	0.450778	0.0105712	up
Fs vs CK	MSTRG.12877	5.56506	0.0106691	up
Fs vs CK	MSTRG.42632	3.15467	0.0106691	up
Fs vs CK	IFM89_000377	1.25771	0.0106691	up
Fs vs CK	IFM89_028908	0.278513	0.0106691	up
Fs vs CK	IFM89_018721	0.873705	0.0107022	up
Fs vs CK	IFM89_000898	0.924496	0.0107453	up
Fs vs CK	MSTRG.23710	5.02435	0.0111996	up
Fs vs CK	IFM89_013736	0.68953	0.0112417	up
Fs vs CK	IFM89_017223	2.47791	0.0113221	up
Fs vs CK	MSTRG.41347	3.41663	0.011463	up
Fs vs CK	IFM89_034548	1.53148	0.0125011	up
Fs vs CK	IFM89_009809	0.677612	0.0125155	up
Fs vs CK	IFM89_028263	0.877107	0.012821	up
Fs vs CK	IFM89_031351	1.69638	0.0133226	up
Fs vs CK	IFM89_001368	0.589213	0.0135243	up
Fs vs CK	IFM89_022767	1.47969	0.0135405	up
Fs vs CK	IFM89_024040	0.47183	0.0136299	up
Fs vs CK	IFM89_005596	2.14416	0.0144479	up
Fs vs CK	IFM89_019825	0.732605	0.014555	up
Fs vs CK	IFM89_023772	0.636265	0.014555	up
Fs vs CK	IFM89_039678	2.18183	0.0146798	up
Fs vs CK	IFM89_031447	1.59404	0.0146798	up
Fs vs CK	IFM89_018872	3.55218	0.0146828	up
Fs vs CK	IFM89_027405	0.942716	0.0146828	up
Fs vs CK	IFM89_019146	4.40331	0.0147723	up
Fs vs CK	IFM89_033438	1.80528	0.0147723	up
Fs vs CK	IFM89_006914	1.60406	0.0147723	up
Fs vs CK	IFM89_020416	1.10035	0.015013	up
Fs vs CK	IFM89_013910	0.898876	0.0151893	up
Fs vs CK	IFM89_010254	1.56416	0.0155737	up
Fs vs CK	MSTRG.42659	0.413033	0.0155737	up
Fs vs CK	IFM89_035079	0.409593	0.0158377	up
Fs vs CK	IFM89_010630	0.853976	0.0158868	up
Fs vs CK	MSTRG.14355	0.530723	0.0158868	up
Fs vs CK	IFM89_036106	0.396655	0.0158868	up
Fs vs CK	IFM89_023872	2.74001	0.0165096	up
Fs vs CK	MSTRG.13251	4.05223	0.0166321	up
Fs vs CK	IFM89_018625	1.35733	0.0166321	up
Fs vs CK	IFM89_019821	1.65048	0.0167857	up
Fs vs CK	IFM89_024888	0.902459	0.0170004	up
Fs vs CK	IFM89_036316	0.383763	0.0174507	up
Fs vs CK	IFM89_030925	1.00974	0.0177967	up
Fs vs CK	IFM89_036141	1.70841	0.017953	up
Fs vs CK	IFM89_038830	1.62114	0.017953	up
Fs vs CK	IFM89_024412	1.02489	0.017953	up
Fs vs CK	IFM89_016723	1.3518	0.0181043	up
Fs vs CK	IFM89_007493	0.920174	0.018237	up
Fs vs CK	IFM89_019691	2.44768	0.0184099	up
Fs vs CK	IFM89_003578	2.17872	0.0185128	up
Fs vs CK	IFM89_020066	0.418032	0.0189595	up
Fs vs CK	IFM89_021752	1.31149	0.0192319	up
Fs vs CK	IFM89_034619	0.675392	0.0193969	up
Fs vs CK	IFM89_033903	4.15632	0.0194569	up
Fs vs CK	IFM89_022999	0.746427	0.0194569	up
Fs vs CK	IFM89_035515	0.540807	0.0194569	up
Fs vs CK	MSTRG.10798	0.479857	0.0194569	up
Fs vs CK	IFM89_020229	0.345789	0.0194569	up
Fs vs CK	IFM89_033252	4.56846	0.0197258	up
Fs vs CK	IFM89_014844	2.84563	0.0197258	up
Fs vs CK	IFM89_000804	1.73013	0.0197258	up
Fs vs CK	IFM89_003529	0.783945	0.0197258	up
Fs vs CK	IFM89_028546	2.84901	0.0198357	up
Fs vs CK	IFM89_011112	1.79605	0.0198357	up
Fs vs CK	IFM89_029014	0.789519	0.019884	up
Fs vs CK	IFM89_005345	1.75848	0.0203742	up
Fs vs CK	IFM89_008865	4.05769	0.020539	up
Fs vs CK	IFM89_029475	1.82316	0.0205579	up
Fs vs CK	IFM89_000347	0.807345	0.0205579	up
Fs vs CK	IFM89_039238	0.959076	0.0206601	up
Fs vs CK	MSTRG.26084	4.92278	0.0208351	up
Fs vs CK	IFM89_010859	1.50496	0.0208351	up
Fs vs CK	IFM89_021227	0.690645	0.0211262	up
Fs vs CK	MSTRG.17995	1.80668	0.021716	up
Fs vs CK	MSTRG.18103	4.90088	0.0218711	up
Fs vs CK	IFM89_007260	2.43636	0.0222942	up
Fs vs CK	IFM89_032044	0.433565	0.022442	up
Fs vs CK	IFM89_035068	0.637191	0.0224496	up
Fs vs CK	IFM89_005850	0.386868	0.0224496	up
Fs vs CK	IFM89_037554	0.897261	0.0224537	up
Fs vs CK	IFM89_012145	2.71896	0.0226178	up
Fs vs CK	IFM89_016347	2.23913	0.0226178	up
Fs vs CK	IFM89_039545	1.41514	0.0226622	up
Fs vs CK	IFM89_026193	1.31334	0.0226792	up
Fs vs CK	IFM89_013725	3.22521	0.0227429	up
Fs vs CK	MSTRG.15082	1.93158	0.0229953	up
Fs vs CK	MSTRG.4557	2.90489	0.0231714	up
Fs vs CK	IFM89_026588	1.03598	0.0235974	up
Fs vs CK	IFM89_034751	1.19921	0.0236888	up
Fs vs CK	IFM89_035042	1.15072	0.0236962	up
Fs vs CK	IFM89_013752	0.857101	0.0238027	up
Fs vs CK	IFM89_010767	0.587838	0.0238478	up
Fs vs CK	IFM89_027168	2.68215	0.0242293	up
Fs vs CK	IFM89_036952	0.873324	0.0246506	up
Fs vs CK	IFM89_032511	0.644656	0.0247136	up
Fs vs CK	IFM89_022215	0.672377	0.0251102	up
Fs vs CK	IFM89_037990	1.13001	0.0253387	up
Fs vs CK	MSTRG.33482	4.17093	0.0253852	up
Fs vs CK	MSTRG.42664	1.12301	0.0253852	up
Fs vs CK	IFM89_039006	3.2249	0.0259979	up
Fs vs CK	MSTRG.36402	2.326	0.0259979	up
Fs vs CK	IFM89_031494	1.00578	0.0259979	up
Fs vs CK	IFM89_027072	0.865555	0.0259979	up
Fs vs CK	IFM89_037410	2.44709	0.0263162	up
Fs vs CK	IFM89_031741	0.479683	0.0265079	up
Fs vs CK	IFM89_031264	0.796169	0.0266096	up
Fs vs CK	IFM89_007774	1.40044	0.0273329	up
Fs vs CK	IFM89_022530	0.745816	0.0273329	up
Fs vs CK	IFM89_025108	0.518078	0.0273329	up
Fs vs CK	IFM89_002105	2.14323	0.0279027	up
Fs vs CK	IFM89_027170	1.03545	0.0279438	up
Fs vs CK	IFM89_014776	0.579344	0.0280128	up
Fs vs CK	IFM89_002174	1.1705	0.0283876	up
Fs vs CK	MSTRG.32330	4.52741	0.0293992	up
Fs vs CK	IFM89_007362	1.26536	0.0295715	up
Fs vs CK	IFM89_006725	1.39557	0.029636	up
Fs vs CK	IFM89_013556	3.93927	0.0300148	up
Fs vs CK	MSTRG.33986	2.15968	0.0300351	up
Fs vs CK	IFM89_003919	0.576371	0.0300917	up
Fs vs CK	IFM89_031172	0.767732	0.0302188	up
Fs vs CK	IFM89_012645	0.69869	0.0302233	up
Fs vs CK	MSTRG.34981	3.79332	0.0303131	up
Fs vs CK	MSTRG.18674	0.532626	0.030595	up
Fs vs CK	IFM89_021118	0.690035	0.0307587	up
Fs vs CK	IFM89_004655	4.21628	0.0309111	up
Fs vs CK	IFM89_034161	0.327645	0.0309111	up
Fs vs CK	MSTRG.43100	2.70744	0.0310505	up
Fs vs CK	IFM89_002192	1.55993	0.0310505	up
Fs vs CK	IFM89_020771	0.618496	0.0310505	up
Fs vs CK	IFM89_007087	0.634493	0.0312731	up
Fs vs CK	MSTRG.42627	1.59371	0.0313386	up
Fs vs CK	IFM89_036660	1.2176	0.0319531	up
Fs vs CK	IFM89_025967	1.05208	0.0322234	up
Fs vs CK	IFM89_023724	0.84544	0.0323756	up
Fs vs CK	IFM89_029591	2.53528	0.0327845	up
Fs vs CK	IFM89_021702	1.70318	0.0327845	up
Fs vs CK	IFM89_001382	1.22465	0.0327845	up
Fs vs CK	IFM89_026883	1.38805	0.033183	up
Fs vs CK	IFM89_003896	0.325915	0.033183	up
Fs vs CK	IFM89_036989	0.990108	0.0334521	up
Fs vs CK	IFM89_036548	0.602108	0.0336988	up
Fs vs CK	MSTRG.38834	4.40665	0.0338532	up
Fs vs CK	IFM89_002321	2.17153	0.0341065	up
Fs vs CK	MSTRG.41701	1.10919	0.0341065	up
Fs vs CK	IFM89_018253	0.930786	0.034311	up
Fs vs CK	IFM89_020080	0.976229	0.0346481	up
Fs vs CK	IFM89_032935	0.926578	0.0346481	up
Fs vs CK	IFM89_029477	0.970584	0.0349934	up
Fs vs CK	IFM89_021754	0.563502	0.0349934	up
Fs vs CK	IFM89_003083	0.283766	0.035004	up
Fs vs CK	IFM89_010886	0.584074	0.0350121	up
Fs vs CK	IFM89_034202	4.79704	0.0351485	up
Fs vs CK	IFM89_033243	0.667064	0.0351485	up
Fs vs CK	IFM89_005806	2.50267	0.0355378	up
Fs vs CK	IFM89_029310	0.559704	0.0355378	up
Fs vs CK	IFM89_018660	0.889476	0.0356025	up
Fs vs CK	IFM89_013909	1.57942	0.0366215	up
Fs vs CK	IFM89_005756	0.573826	0.0368167	up
Fs vs CK	IFM89_026004	1.58071	0.036836	up
Fs vs CK	IFM89_005237	1.07	0.036836	up
Fs vs CK	IFM89_033542	0.619094	0.0368477	up
Fs vs CK	IFM89_023243	0.659213	0.0373094	up
Fs vs CK	IFM89_038341	0.966031	0.0373275	up
Fs vs CK	IFM89_023130	2.43478	0.0377582	up
Fs vs CK	IFM89_014254	0.783049	0.038001	up
Fs vs CK	IFM89_012106	1.80794	0.038368	up
Fs vs CK	IFM89_037307	0.733697	0.038368	up
Fs vs CK	IFM89_013735	0.609719	0.038368	up
Fs vs CK	IFM89_017286	5.08792	0.0385949	up
Fs vs CK	IFM89_017641	0.541496	0.0387437	up
Fs vs CK	IFM89_010857	4.40783	0.0389218	up
Fs vs CK	IFM89_018723	2.71229	0.0389218	up
Fs vs CK	IFM89_017840	0.500635	0.0389218	up
Fs vs CK	IFM89_020390	3.58402	0.0393224	up
Fs vs CK	IFM89_032446	1.08769	0.0398036	up
Fs vs CK	IFM89_026000	0.843131	0.0398588	up
Fs vs CK	IFM89_006286	1.39254	0.0399822	up
Fs vs CK	IFM89_026822	3.50592	0.0403991	up
Fs vs CK	IFM89_013102	0.471541	0.0404563	up
Fs vs CK	IFM89_026582	0.901192	0.0404704	up
Fs vs CK	MSTRG.28654	3.61423	0.040555	up
Fs vs CK	IFM89_022013	2.26749	0.040555	up
Fs vs CK	MSTRG.27353	5.20412	0.0410634	up
Fs vs CK	IFM89_034796	0.543942	0.0410634	up
Fs vs CK	IFM89_001638	1.30651	0.0410848	up
Fs vs CK	IFM89_021484	0.6204	0.0411367	up
Fs vs CK	IFM89_021462	0.499579	0.0412725	up
Fs vs CK	IFM89_013388	0.664902	0.041483	up
Fs vs CK	IFM89_020304	0.428732	0.0418124	up
Fs vs CK	IFM89_033052	3.08176	0.0418253	up
Fs vs CK	IFM89_014826	1.41301	0.0424228	up
Fs vs CK	IFM89_024479	1.02654	0.0424228	up
Fs vs CK	IFM89_034102	0.661353	0.0425925	up
Fs vs CK	IFM89_032275	0.517609	0.0426428	up
Fs vs CK	IFM89_001626	0.514765	0.0428823	up
Fs vs CK	IFM89_033892	0.60963	0.0429794	up
Fs vs CK	IFM89_013976	3.76591	0.0430109	up
Fs vs CK	MSTRG.35459	4.85841	0.0432425	up
Fs vs CK	IFM89_032983	1.17025	0.043403	up
Fs vs CK	MSTRG.25240	4.7964	0.0434112	up
Fs vs CK	IFM89_039540	0.860227	0.0436114	up
Fs vs CK	IFM89_003025	1.50271	0.0436506	up
Fs vs CK	IFM89_013924	1.15625	0.0436506	up
Fs vs CK	IFM89_024458	0.489229	0.0436506	up
Fs vs CK	MSTRG.28634	3.01336	0.0437192	up
Fs vs CK	IFM89_002961	3.24738	0.0437777	up
Fs vs CK	MSTRG.30304	2.09161	0.044216	up
Fs vs CK	IFM89_010387	2.15723	0.0448987	up
Fs vs CK	IFM89_017857	0.645517	0.0457143	up
Fs vs CK	IFM89_034414	0.852511	0.0458954	up
Fs vs CK	IFM89_024401	0.526121	0.0459354	up
Fs vs CK	IFM89_009279	3.36928	0.0459906	up
Fs vs CK	IFM89_005899	0.677104	0.0460398	up
Fs vs CK	IFM89_033553	4.54492	0.0463916	up
Fs vs CK	IFM89_014442	4.06595	0.0475486	up
Fs vs CK	IFM89_015113	0.95054	0.0475486	up
Fs vs CK	IFM89_025777	0.581189	0.0479674	up
Fs vs CK	MSTRG.29236	4.47843	0.0482897	up
Fs vs CK	IFM89_029669	1.68049	0.0482897	up
Fs vs CK	IFM89_000071	1.10911	0.0491869	up
Fs vs CK	IFM89_009264	0.880783	0.0499646	up
Fs vs CK	IFM89_009800	0.862237	0.0499646	up
Fs vs CK	IFM89_039592	-1.13211	3.6036e-05	down
Fs vs CK	IFM89_033584	-3.37888	0.000270408	down
Fs vs CK	IFM89_027122	-0.87959	0.000286171	down
Fs vs CK	MSTRG.7916	-1.47963	0.000661257	down
Fs vs CK	MSTRG.14844	-0.924898	0.000737139	down
Fs vs CK	IFM89_031216	-0.370959	0.000737139	down
Fs vs CK	IFM89_033746	-0.778625	0.000909541	down
Fs vs CK	MSTRG.42655	-2.13289	0.000971947	down
Fs vs CK	IFM89_033114	-1.11572	0.000987908	down
Fs vs CK	IFM89_021450	-5.08129	0.000996897	down
Fs vs CK	IFM89_032556	-1.22909	0.000996897	down
Fs vs CK	IFM89_016567	-0.535139	0.00114197	down
Fs vs CK	MSTRG.18991	-5.57239	0.00145525	down
Fs vs CK	IFM89_001281	-0.307057	0.0014717	down
Fs vs CK	IFM89_015465	-1.00203	0.00160297	down
Fs vs CK	MSTRG.26797	-5.06979	0.00161424	down
Fs vs CK	MSTRG.31012	-7.232	0.00194587	down
Fs vs CK	IFM89_021711	-3.23733	0.00194587	down
Fs vs CK	IFM89_011197	-0.608962	0.00194587	down
Fs vs CK	IFM89_033148	-1.36643	0.00257007	down
Fs vs CK	IFM89_035509	-0.402414	0.00262612	down
Fs vs CK	IFM89_002335	-0.415644	0.00275015	down
Fs vs CK	IFM89_012276	-0.496217	0.00275674	down
Fs vs CK	MSTRG.11058	-5.12178	0.00315667	down
Fs vs CK	IFM89_030552	-0.569462	0.00324159	down
Fs vs CK	IFM89_016385	-0.845681	0.00325486	down
Fs vs CK	IFM89_000036	-2.58169	0.00331578	down
Fs vs CK	IFM89_034654	-1.01302	0.00333378	down
Fs vs CK	MSTRG.27998	-6.18759	0.00359197	down
Fs vs CK	IFM89_005165	-3.61526	0.00360026	down
Fs vs CK	IFM89_013598	-1.16489	0.00366688	down
Fs vs CK	IFM89_013803	-1.59205	0.00370496	down
Fs vs CK	IFM89_011438	-0.398352	0.00377089	down
Fs vs CK	MSTRG.17639	-5.39698	0.00392995	down
Fs vs CK	IFM89_021813	-1.07678	0.00450816	down
Fs vs CK	IFM89_006760	-1.64675	0.00451321	down
Fs vs CK	IFM89_035647	-3.75447	0.00463765	down
Fs vs CK	IFM89_036625	-2.89463	0.00463765	down
Fs vs CK	IFM89_028035	-4.00231	0.00465268	down
Fs vs CK	IFM89_025697	-3.24365	0.00465268	down
Fs vs CK	IFM89_038570	-1.04965	0.00465268	down
Fs vs CK	IFM89_031286	-0.43051	0.00465268	down
Fs vs CK	IFM89_002198	-6.91041	0.00466342	down
Fs vs CK	MSTRG.28102	-1.91536	0.00466342	down
Fs vs CK	IFM89_037220	-1.22156	0.00466342	down
Fs vs CK	MSTRG.42240	-1.50936	0.00484979	down
Fs vs CK	IFM89_026463	-0.292935	0.00494026	down
Fs vs CK	IFM89_016709	-0.981864	0.00495523	down
Fs vs CK	IFM89_032893	-0.618375	0.00509895	down
Fs vs CK	IFM89_023881	-0.278643	0.00562808	down
Fs vs CK	MSTRG.17443	-4.86312	0.00575784	down
Fs vs CK	IFM89_010566	-4.84252	0.00577549	down
Fs vs CK	IFM89_039896	-4.54095	0.0062293	down
Fs vs CK	IFM89_036722	-3.00011	0.0067847	down
Fs vs CK	IFM89_029968	-0.369503	0.00686249	down
Fs vs CK	MSTRG.42517	-0.434946	0.00720852	down
Fs vs CK	IFM89_021263	-0.895858	0.007405	down
Fs vs CK	IFM89_001943	-5.09778	0.00748994	down
Fs vs CK	IFM89_025980	-2.95183	0.00748994	down
Fs vs CK	IFM89_003516	-0.601139	0.00760166	down
Fs vs CK	MSTRG.29362	-4.03749	0.00771285	down
Fs vs CK	IFM89_036191	-1.0735	0.00771285	down
Fs vs CK	MSTRG.13180	-5.55683	0.00811797	down
Fs vs CK	IFM89_027926	-3.32491	0.00811797	down
Fs vs CK	IFM89_010193	-1.06539	0.00811797	down
Fs vs CK	IFM89_030967	-0.771254	0.00811797	down
Fs vs CK	MSTRG.28103	-1.16653	0.0084651	down
Fs vs CK	IFM89_004073	-5.18368	0.00853463	down
Fs vs CK	IFM89_026554	-5.43749	0.00868528	down
Fs vs CK	IFM89_026860	-4.07464	0.00871853	down
Fs vs CK	IFM89_027749	-4.76195	0.00881843	down
Fs vs CK	IFM89_019982	-0.396517	0.00881843	down
Fs vs CK	MSTRG.22950	-5.09112	0.00888416	down
Fs vs CK	MSTRG.43346	-3.46476	0.0092761	down
Fs vs CK	MSTRG.42511	-1.16179	0.00932567	down
Fs vs CK	MSTRG.43323	-4.72651	0.00949101	down
Fs vs CK	IFM89_014843	-2.51971	0.00973551	down
Fs vs CK	MSTRG.33176	-3.94428	0.0097394	down
Fs vs CK	IFM89_017148	-4.1174	0.0101884	down
Fs vs CK	IFM89_010611	-0.446546	0.010305	down
Fs vs CK	IFM89_013258	-1.50282	0.0106691	down
Fs vs CK	IFM89_037508	-3.58751	0.0111669	down
Fs vs CK	MSTRG.42330	-0.508242	0.0111916	down
Fs vs CK	IFM89_023854	-0.648346	0.0113221	down
Fs vs CK	MSTRG.11059	-4.657	0.0118297	down
Fs vs CK	IFM89_039369	-1.00125	0.0118667	down
Fs vs CK	IFM89_020556	-3.13558	0.0120186	down
Fs vs CK	IFM89_038575	-2.53558	0.0123433	down
Fs vs CK	IFM89_013314	-0.53735	0.0123778	down
Fs vs CK	MSTRG.17887	-4.5289	0.0125155	down
Fs vs CK	MSTRG.18527	-4.29301	0.0129812	down
Fs vs CK	MSTRG.6516	-3.34835	0.0130972	down
Fs vs CK	IFM89_011167	-1.79824	0.013232	down
Fs vs CK	IFM89_033993	-0.857806	0.013232	down
Fs vs CK	IFM89_023610	-0.99675	0.0133226	down
Fs vs CK	IFM89_038030	-1.40167	0.0138628	down
Fs vs CK	IFM89_002657	-1.23488	0.0146734	down
Fs vs CK	IFM89_032279	-4.48646	0.0146798	down
Fs vs CK	MSTRG.7075	-3.60861	0.0146798	down
Fs vs CK	IFM89_038042	-3.23776	0.0146798	down
Fs vs CK	IFM89_012447	-0.878347	0.0146798	down
Fs vs CK	IFM89_012566	-0.334084	0.0146798	down
Fs vs CK	IFM89_039773	-0.315005	0.0147723	down
Fs vs CK	IFM89_018123	-0.504245	0.0149054	down
Fs vs CK	MSTRG.1818	-5.03375	0.0155737	down
Fs vs CK	IFM89_033726	-1.01559	0.0155737	down
Fs vs CK	MSTRG.25266	-3.79213	0.0157672	down
Fs vs CK	MSTRG.18411	-1.67759	0.0158047	down
Fs vs CK	IFM89_039674	-0.438985	0.0160168	down
Fs vs CK	IFM89_009873	-0.96064	0.0162602	down
Fs vs CK	MSTRG.2591	-4.93772	0.0165096	down
Fs vs CK	IFM89_016962	-0.432064	0.016691	down
Fs vs CK	MSTRG.20937	-0.975213	0.0166947	down
Fs vs CK	MSTRG.39229	-4.60927	0.0170452	down
Fs vs CK	MSTRG.15501	-4.0347	0.017953	down
Fs vs CK	IFM89_028388	-0.689916	0.0183477	down
Fs vs CK	MSTRG.17583	-5.55165	0.0185128	down
Fs vs CK	MSTRG.36513	-1.36308	0.0185128	down
Fs vs CK	MSTRG.24761	-4.28982	0.0186638	down
Fs vs CK	IFM89_038544	-0.310413	0.0188864	down
Fs vs CK	IFM89_035766	-0.417411	0.0189595	down
Fs vs CK	MSTRG.31401	-4.23877	0.0196427	down
Fs vs CK	IFM89_024246	-1.17788	0.0197258	down
Fs vs CK	IFM89_002472	-0.264137	0.0197258	down
Fs vs CK	IFM89_019275	-1.31316	0.0205579	down
Fs vs CK	IFM89_011566	-0.950227	0.0205579	down
Fs vs CK	IFM89_027287	-1.62954	0.0209259	down
Fs vs CK	IFM89_013568	-1.48398	0.0211028	down
Fs vs CK	IFM89_017854	-0.501011	0.0214329	down
Fs vs CK	IFM89_013664	-1.20182	0.0215974	down
Fs vs CK	MSTRG.39864	-3.63595	0.021716	down
Fs vs CK	IFM89_014931	-2.77129	0.021716	down
Fs vs CK	IFM89_008698	-0.521516	0.0224343	down
Fs vs CK	IFM89_025309	-0.45268	0.0224496	down
Fs vs CK	IFM89_025610	-0.670424	0.022989	down
Fs vs CK	IFM89_002570	-1.98645	0.0231593	down
Fs vs CK	IFM89_022989	-0.490578	0.0231593	down
Fs vs CK	MSTRG.3699	-2.65222	0.023501	down
Fs vs CK	IFM89_020128	-2.20893	0.0238027	down
Fs vs CK	IFM89_037324	-1.61596	0.0238027	down
Fs vs CK	IFM89_034283	-1.44573	0.0238027	down
Fs vs CK	IFM89_008909	-4.3442	0.0238124	down
Fs vs CK	IFM89_012552	-0.812072	0.0243754	down
Fs vs CK	IFM89_039903	-1.21539	0.0243794	down
Fs vs CK	IFM89_039875	-0.94815	0.0246391	down
Fs vs CK	MSTRG.29425	-3.57241	0.024905	down
Fs vs CK	IFM89_034196	-1.0446	0.0249855	down
Fs vs CK	IFM89_032001	-0.857039	0.0249855	down
Fs vs CK	MSTRG.32753	-1.283	0.0251102	down
Fs vs CK	IFM89_000166	-0.311516	0.0253852	down
Fs vs CK	IFM89_026175	-1.21946	0.0259979	down
Fs vs CK	IFM89_000404	-0.527866	0.0259979	down
Fs vs CK	MSTRG.31642	-3.25315	0.0261821	down
Fs vs CK	IFM89_003399	-2.65579	0.0261821	down
Fs vs CK	IFM89_017598	-2.23491	0.0261821	down
Fs vs CK	IFM89_031656	-0.460643	0.0261821	down
Fs vs CK	IFM89_009976	-0.368775	0.0261821	down
Fs vs CK	IFM89_032128	-4.55213	0.0266096	down
Fs vs CK	IFM89_025012	-0.625287	0.0266096	down
Fs vs CK	MSTRG.6265	-3.25519	0.0269985	down
Fs vs CK	IFM89_016933	-1.544	0.0270316	down
Fs vs CK	IFM89_009811	-0.578814	0.0278238	down
Fs vs CK	IFM89_018902	-1.22893	0.0278495	down
Fs vs CK	MSTRG.43373	-3.5201	0.0280128	down
Fs vs CK	IFM89_024340	-2.98448	0.0280922	down
Fs vs CK	IFM89_021490	-1.48121	0.0282054	down
Fs vs CK	IFM89_014815	-0.933901	0.0282898	down
Fs vs CK	MSTRG.15310	-3.58058	0.0292045	down
Fs vs CK	IFM89_016363	-1.66275	0.0295715	down
Fs vs CK	IFM89_034389	-3.18339	0.0295763	down
Fs vs CK	IFM89_012442	-0.999286	0.0295763	down
Fs vs CK	IFM89_014007	-4.52534	0.029636	down
Fs vs CK	MSTRG.30621	-2.60565	0.0300917	down
Fs vs CK	IFM89_003883	-4.25539	0.0306063	down
Fs vs CK	IFM89_005747	-1.30671	0.0306871	down
Fs vs CK	IFM89_008626	-2.30827	0.0309111	down
Fs vs CK	IFM89_002956	-0.92271	0.0309111	down
Fs vs CK	IFM89_035314	-0.461057	0.0309111	down
Fs vs CK	MSTRG.17631	-4.41036	0.0310505	down
Fs vs CK	IFM89_036795	-1.62879	0.0310505	down
Fs vs CK	IFM89_012486	-0.314268	0.0310505	down
Fs vs CK	IFM89_002982	-1.53947	0.0317282	down
Fs vs CK	IFM89_027293	-1.02722	0.031861	down
Fs vs CK	MSTRG.21497	-3.25335	0.0319574	down
Fs vs CK	MSTRG.31894	-4.11662	0.0327845	down
Fs vs CK	IFM89_036216	-3.81759	0.0327845	down
Fs vs CK	IFM89_019639	-3.35578	0.0327845	down
Fs vs CK	MSTRG.33759	-2.75904	0.0327845	down
Fs vs CK	IFM89_026108	-0.493119	0.0327845	down
Fs vs CK	IFM89_002447	-0.676255	0.0329916	down
Fs vs CK	IFM89_014408	-1.95237	0.0331444	down
Fs vs CK	IFM89_002020	-1.48601	0.0331444	down
Fs vs CK	MSTRG.26157	-1.38717	0.0331444	down
Fs vs CK	MSTRG.17604	-1.21346	0.0336988	down
Fs vs CK	IFM89_028815	-2.04009	0.0338984	down
Fs vs CK	IFM89_003144	-0.50891	0.0341065	down
Fs vs CK	IFM89_014992	-3.68419	0.0342065	down
Fs vs CK	IFM89_034028	-1.03362	0.0342833	down
Fs vs CK	IFM89_022527	-1.76654	0.0343154	down
Fs vs CK	MSTRG.4109	-1.56732	0.0344278	down
Fs vs CK	IFM89_007304	-3.28342	0.0348313	down
Fs vs CK	IFM89_025100	-0.334925	0.034832	down
Fs vs CK	IFM89_029517	-0.725445	0.0349004	down
Fs vs CK	IFM89_026557	-2.78138	0.0349934	down
Fs vs CK	IFM89_012401	-2.40804	0.0349934	down
Fs vs CK	IFM89_032787	-1.0626	0.0349934	down
Fs vs CK	IFM89_004700	-0.731746	0.0349934	down
Fs vs CK	MSTRG.14229	-4.05891	0.035004	down
Fs vs CK	IFM89_025028	-0.613719	0.035004	down
Fs vs CK	IFM89_008704	-0.843181	0.0355378	down
Fs vs CK	IFM89_036031	-0.719804	0.0356025	down
Fs vs CK	IFM89_016114	-3.36212	0.0358331	down
Fs vs CK	MSTRG.4118	-4.65712	0.0363253	down
Fs vs CK	IFM89_029248	-0.397068	0.036836	down
Fs vs CK	MSTRG.42172	-0.782041	0.0370247	down
Fs vs CK	IFM89_029724	-4.64799	0.0373046	down
Fs vs CK	IFM89_031424	-0.899509	0.0373094	down
Fs vs CK	IFM89_028066	-0.556229	0.0373094	down
Fs vs CK	IFM89_001284	-0.836393	0.0374376	down
Fs vs CK	IFM89_009502	-0.397964	0.0374376	down
Fs vs CK	IFM89_019809	-1.99455	0.037694	down
Fs vs CK	MSTRG.34599	-4.2419	0.0377582	down
Fs vs CK	IFM89_033937	-0.591816	0.0377582	down
Fs vs CK	IFM89_022268	-0.525403	0.0377819	down
Fs vs CK	IFM89_030275	-0.467889	0.0377819	down
Fs vs CK	IFM89_012257	-0.274163	0.0377819	down
Fs vs CK	IFM89_001765	-0.362362	0.038001	down
Fs vs CK	IFM89_030041	-0.296313	0.038001	down
Fs vs CK	MSTRG.6713	-4.16115	0.038368	down
Fs vs CK	IFM89_001253	-2.14967	0.038368	down
Fs vs CK	MSTRG.16316	-0.978899	0.038368	down
Fs vs CK	IFM89_004187	-0.840162	0.038368	down
Fs vs CK	IFM89_021591	-0.703601	0.038368	down
Fs vs CK	IFM89_038141	-3.63756	0.0388536	down
Fs vs CK	IFM89_028724	-2.048	0.0388854	down
Fs vs CK	IFM89_004494	-0.372141	0.0389156	down
Fs vs CK	MSTRG.18164	-3.67397	0.0391148	down
Fs vs CK	IFM89_026746	-0.457313	0.0391946	down
Fs vs CK	IFM89_023764	-3.29413	0.0394619	down
Fs vs CK	IFM89_021983	-0.337844	0.0399822	down
Fs vs CK	IFM89_002759	-0.555286	0.0403991	down
Fs vs CK	IFM89_022238	-0.419665	0.0410634	down
Fs vs CK	IFM89_037711	-0.270497	0.0410634	down
Fs vs CK	IFM89_025912	-0.377617	0.0410848	down
Fs vs CK	MSTRG.29361	-2.92544	0.0414971	down
Fs vs CK	IFM89_007351	-3.29265	0.0418253	down
Fs vs CK	IFM89_033801	-3.52448	0.0424228	down
Fs vs CK	IFM89_021545	-0.988475	0.0426428	down
Fs vs CK	IFM89_036442	-1.20524	0.043403	down
Fs vs CK	IFM89_038598	-0.575638	0.043403	down
Fs vs CK	MSTRG.43129	-3.6431	0.0436506	down
Fs vs CK	IFM89_011103	-2.41558	0.0436506	down
Fs vs CK	IFM89_036391	-2.41283	0.0436506	down
Fs vs CK	IFM89_020099	-1.26154	0.044216	down
Fs vs CK	IFM89_018656	-3.746	0.0443305	down
Fs vs CK	IFM89_026301	-0.422361	0.0446186	down
Fs vs CK	IFM89_028007	-1.76585	0.045315	down
Fs vs CK	MSTRG.31171	-4.37308	0.0458343	down
Fs vs CK	IFM89_008251	-0.425512	0.0458343	down
Fs vs CK	IFM89_034403	-0.916756	0.0460726	down
Fs vs CK	IFM89_020574	-0.93079	0.0464563	down
Fs vs CK	IFM89_004952	-0.287028	0.0468012	down
Fs vs CK	IFM89_000909	-2.16742	0.0469505	down
Fs vs CK	IFM89_015563	-2.14388	0.0475486	down
Fs vs CK	MSTRG.13571	-1.69672	0.0475486	down
Fs vs CK	IFM89_000416	-1.10618	0.0475486	down
Fs vs CK	IFM89_017628	-0.502883	0.0475486	down
Fs vs CK	IFM89_034550	-0.969412	0.0479674	down
Fs vs CK	MSTRG.27999	-4.61348	0.0482897	down
Fs vs CK	MSTRG.42516	-0.481235	0.0482897	down
Fs vs CK	MSTRG.35492	-4.66877	0.0491869	down
Fs vs CK	IFM89_010670	-0.734461	0.0491869	down
Fs vs CK	IFM89_035703	-0.631613	0.0491869	down
Fs vs CK	IFM89_023617	-1.3266	0.0493587	down
Fs vs CK	IFM89_031758	-1.28929	0.0499646	down
Fs vs CK	IFM89_020340	-1.11865	0.0499646	down
Fs vs CK	IFM89_023327	-0.581257	0.0499646	down
BCA vs CK	IFM89_033844	3.31909	6.83568e-10	up
BCA vs CK	IFM89_031944	3.11903	6.83568e-10	up
BCA vs CK	IFM89_032277	2.55806	1.30837e-09	up
BCA vs CK	MSTRG.42110	3.30445	1.88334e-08	up
BCA vs CK	IFM89_033666	3.73957	2.10682e-08	up
BCA vs CK	IFM89_026459	2.37147	3.10996e-08	up
BCA vs CK	IFM89_010767	1.12097	3.63573e-08	up
BCA vs CK	IFM89_033077	2.75546	3.86751e-08	up
BCA vs CK	MSTRG.42109	2.67743	3.86751e-08	up
BCA vs CK	IFM89_004973	2.85823	4.04925e-08	up
BCA vs CK	IFM89_014012	1.58847	2.27429e-07	up
BCA vs CK	IFM89_036180	3.62627	3.70199e-07	up
BCA vs CK	IFM89_024610	4.14446	4.2555e-07	up
BCA vs CK	IFM89_009800	1.67414	6.02362e-07	up
BCA vs CK	IFM89_023995	1.63459	1.50574e-06	up
BCA vs CK	IFM89_036113	2.90697	1.63511e-06	up
BCA vs CK	IFM89_039421	1.20661	1.63511e-06	up
BCA vs CK	IFM89_007465	3.8449	1.79392e-06	up
BCA vs CK	IFM89_024042	1.92153	3.18919e-06	up
BCA vs CK	IFM89_025126	4.26384	7.71702e-06	up
BCA vs CK	IFM89_019018	1.59407	7.8696e-06	up
BCA vs CK	IFM89_026273	1.92861	9.22307e-06	up
BCA vs CK	IFM89_032334	0.442962	1.02782e-05	up
BCA vs CK	IFM89_021854	1.27397	1.93566e-05	up
BCA vs CK	IFM89_015540	2.15592	2.03638e-05	up
BCA vs CK	IFM89_034160	0.722923	2.16668e-05	up
BCA vs CK	MSTRG.20420	4.46753	2.18014e-05	up
BCA vs CK	IFM89_024976	2.53004	2.99359e-05	up
BCA vs CK	IFM89_000898	1.32763	2.99359e-05	up
BCA vs CK	IFM89_024577	1.28884	3.22032e-05	up
BCA vs CK	IFM89_014946	1.87003	3.23007e-05	up
BCA vs CK	IFM89_029164	2.17114	3.66204e-05	up
BCA vs CK	IFM89_012081	0.297716	4.49966e-05	up
BCA vs CK	IFM89_003051	1.78325	4.93666e-05	up
BCA vs CK	IFM89_029530	2.46698	5.54779e-05	up
BCA vs CK	IFM89_032694	1.90141	5.69521e-05	up
BCA vs CK	IFM89_015687	1.39394	5.69521e-05	up
BCA vs CK	IFM89_015765	0.945065	6.27684e-05	up
BCA vs CK	IFM89_024618	4.47681	6.37664e-05	up
BCA vs CK	IFM89_015689	0.665207	6.89836e-05	up
BCA vs CK	IFM89_016424	0.410935	6.89836e-05	up
BCA vs CK	IFM89_009825	2.46637	7.02786e-05	up
BCA vs CK	IFM89_008682	1.63963	7.02786e-05	up
BCA vs CK	IFM89_023002	3.02052	8.09644e-05	up
BCA vs CK	IFM89_007979	0.752964	9.74774e-05	up
BCA vs CK	IFM89_015703	0.464239	0.000136884	up
BCA vs CK	IFM89_017557	5.72425	0.000151262	up
BCA vs CK	MSTRG.27012	5.44477	0.000151262	up
BCA vs CK	IFM89_006986	0.8866	0.000151262	up
BCA vs CK	IFM89_010871	0.387843	0.000151262	up
BCA vs CK	IFM89_012319	0.923816	0.000151502	up
BCA vs CK	IFM89_010829	0.865395	0.000151502	up
BCA vs CK	IFM89_032568	2.4494	0.000157278	up
BCA vs CK	IFM89_038678	0.883333	0.000157278	up
BCA vs CK	IFM89_035125	0.542157	0.000165534	up
BCA vs CK	IFM89_031629	2.35927	0.000174528	up
BCA vs CK	IFM89_024427	1.60566	0.000195018	up
BCA vs CK	IFM89_037388	1.35743	0.000217017	up
BCA vs CK	IFM89_001573	1.86092	0.000257446	up
BCA vs CK	IFM89_006315	1.65282	0.000285052	up
BCA vs CK	IFM89_004914	1.20936	0.000285052	up
BCA vs CK	IFM89_000976	0.579281	0.000298954	up
BCA vs CK	IFM89_035792	0.366325	0.000298954	up
BCA vs CK	IFM89_016277	1.43361	0.000343101	up
BCA vs CK	IFM89_037360	0.777654	0.000387403	up
BCA vs CK	IFM89_035664	1.48747	0.000421192	up
BCA vs CK	IFM89_008291	1.24321	0.000421192	up
BCA vs CK	IFM89_025401	1.14537	0.000485174	up
BCA vs CK	IFM89_024619	4.70122	0.000609475	up
BCA vs CK	IFM89_019691	3.20458	0.000609475	up
BCA vs CK	IFM89_010467	2.22091	0.000624126	up
BCA vs CK	IFM89_036087	1.59017	0.000624126	up
BCA vs CK	IFM89_023835	1.48331	0.000634179	up
BCA vs CK	IFM89_026413	1.42188	0.000634179	up
BCA vs CK	IFM89_009200	0.857255	0.000634179	up
BCA vs CK	IFM89_037673	2.04431	0.000661176	up
BCA vs CK	IFM89_010003	0.763571	0.000666831	up
BCA vs CK	MSTRG.22890	0.644321	0.000666831	up
BCA vs CK	IFM89_024613	3.29946	0.000671971	up
BCA vs CK	IFM89_029515	3.64066	0.000673239	up
BCA vs CK	IFM89_016347	2.9359	0.000673239	up
BCA vs CK	IFM89_017669	2.41434	0.000695933	up
BCA vs CK	IFM89_026609	1.78699	0.000696141	up
BCA vs CK	IFM89_031206	0.592249	0.000740637	up
BCA vs CK	IFM89_031936	2.88536	0.000754798	up
BCA vs CK	IFM89_018976	1.41612	0.000771402	up
BCA vs CK	IFM89_032048	1.16804	0.000796205	up
BCA vs CK	IFM89_033546	0.415751	0.000796205	up
BCA vs CK	IFM89_036989	1.35964	0.000796398	up
BCA vs CK	IFM89_013238	0.389182	0.000800196	up
BCA vs CK	IFM89_001705	2.10158	0.000805579	up
BCA vs CK	IFM89_015106	0.777915	0.000806518	up
BCA vs CK	IFM89_005135	0.360349	0.000806802	up
BCA vs CK	IFM89_010894	5.16054	0.00081894	up
BCA vs CK	IFM89_021357	2.04741	0.00081894	up
BCA vs CK	IFM89_003021	2.0089	0.000835677	up
BCA vs CK	MSTRG.10009	1.89738	0.000835677	up
BCA vs CK	IFM89_024341	1.48674	0.000835677	up
BCA vs CK	IFM89_001079	0.909198	0.000835677	up
BCA vs CK	IFM89_030494	1.23929	0.000840329	up
BCA vs CK	IFM89_021106	2.23765	0.000851968	up
BCA vs CK	IFM89_018228	2.15304	0.000851968	up
BCA vs CK	IFM89_037928	4.18165	0.000866974	up
BCA vs CK	IFM89_009501	0.711793	0.000899274	up
BCA vs CK	IFM89_004112	0.759823	0.000925234	up
BCA vs CK	IFM89_011258	2.97184	0.000929165	up
BCA vs CK	MSTRG.467	1.5262	0.00101346	up
BCA vs CK	IFM89_013250	1.5527	0.0010244	up
BCA vs CK	IFM89_032015	1.0149	0.0010244	up
BCA vs CK	IFM89_037369	2.57573	0.00105758	up
BCA vs CK	IFM89_017706	1.57424	0.00105758	up
BCA vs CK	IFM89_027072	1.12345	0.00105758	up
BCA vs CK	IFM89_018625	1.67071	0.00113774	up
BCA vs CK	IFM89_015181	1.72142	0.00118947	up
BCA vs CK	IFM89_028990	0.754431	0.00118947	up
BCA vs CK	IFM89_006143	1.23652	0.00119247	up
BCA vs CK	IFM89_033560	1.68767	0.00123311	up
BCA vs CK	IFM89_023243	0.887826	0.00123801	up
BCA vs CK	MSTRG.21821	5.47787	0.0012677	up
BCA vs CK	IFM89_021778	2.45128	0.00133934	up
BCA vs CK	IFM89_004964	2.07261	0.00133934	up
BCA vs CK	IFM89_029065	1.49032	0.00133934	up
BCA vs CK	IFM89_023369	1.2444	0.00133934	up
BCA vs CK	IFM89_026374	0.844257	0.00133934	up
BCA vs CK	IFM89_020014	2.03897	0.0014243	up
BCA vs CK	IFM89_028630	0.832579	0.00144012	up
BCA vs CK	IFM89_018958	0.510948	0.00153959	up
BCA vs CK	IFM89_013551	0.742392	0.001546	up
BCA vs CK	IFM89_025161	1.85301	0.00156159	up
BCA vs CK	IFM89_011658	4.54451	0.0015851	up
BCA vs CK	IFM89_036365	0.52517	0.00160336	up
BCA vs CK	IFM89_032947	1.39931	0.00162432	up
BCA vs CK	IFM89_026744	0.604772	0.00162955	up
BCA vs CK	IFM89_038621	0.399796	0.00165668	up
BCA vs CK	IFM89_002979	0.937663	0.00166504	up
BCA vs CK	IFM89_024283	1.68058	0.00166594	up
BCA vs CK	IFM89_019527	3.39559	0.00189621	up
BCA vs CK	IFM89_001394	0.956085	0.00190371	up
BCA vs CK	IFM89_029718	2.20603	0.00191242	up
BCA vs CK	IFM89_003536	0.550748	0.00199695	up
BCA vs CK	IFM89_035091	1.85486	0.00209561	up
BCA vs CK	IFM89_017320	1.20534	0.00212518	up
BCA vs CK	IFM89_023793	0.768984	0.00214787	up
BCA vs CK	IFM89_022307	0.537244	0.00214787	up
BCA vs CK	IFM89_017202	0.662424	0.00217462	up
BCA vs CK	IFM89_027816	1.52431	0.0021818	up
BCA vs CK	IFM89_031741	0.59567	0.00219958	up
BCA vs CK	IFM89_002271	0.967838	0.00223871	up
BCA vs CK	IFM89_004649	0.448351	0.00227395	up
BCA vs CK	IFM89_033094	0.435658	0.00227433	up
BCA vs CK	IFM89_004528	0.828914	0.00229019	up
BCA vs CK	IFM89_007493	1.08846	0.00229681	up
BCA vs CK	IFM89_008824	3.30908	0.00232365	up
BCA vs CK	IFM89_011447	3.29153	0.00232365	up
BCA vs CK	IFM89_021652	1.79912	0.00232365	up
BCA vs CK	IFM89_039486	0.447583	0.00233932	up
BCA vs CK	IFM89_029603	0.450237	0.0023877	up
BCA vs CK	IFM89_000594	1.3298	0.00251966	up
BCA vs CK	IFM89_033842	0.62874	0.00256585	up
BCA vs CK	IFM89_033996	0.614466	0.00259928	up
BCA vs CK	IFM89_009209	1.28166	0.00265711	up
BCA vs CK	IFM89_014391	0.501867	0.00269485	up
BCA vs CK	IFM89_037372	1.99079	0.00272251	up
BCA vs CK	IFM89_035971	1.85549	0.00272251	up
BCA vs CK	IFM89_031964	1.5903	0.00273875	up
BCA vs CK	IFM89_003823	5.23694	0.00274092	up
BCA vs CK	IFM89_027275	1.27718	0.00277853	up
BCA vs CK	IFM89_002108	2.06225	0.00285184	up
BCA vs CK	IFM89_006909	1.63103	0.00286919	up
BCA vs CK	IFM89_028908	0.30993	0.00286919	up
BCA vs CK	IFM89_028284	5.39495	0.00290057	up
BCA vs CK	IFM89_023836	1.50825	0.00290057	up
BCA vs CK	IFM89_005809	1.22037	0.00290057	up
BCA vs CK	IFM89_008480	0.585721	0.00290987	up
BCA vs CK	IFM89_008395	2.73658	0.00291497	up
BCA vs CK	IFM89_039080	1.74914	0.00291497	up
BCA vs CK	IFM89_020864	0.70968	0.00304375	up
BCA vs CK	IFM89_011110	0.603812	0.00319028	up
BCA vs CK	IFM89_005281	1.45757	0.00322677	up
BCA vs CK	IFM89_036270	0.573592	0.00322677	up
BCA vs CK	IFM89_006010	0.483348	0.00323561	up
BCA vs CK	MSTRG.43009	3.95085	0.00324193	up
BCA vs CK	IFM89_018398	2.88513	0.00324193	up
BCA vs CK	IFM89_016838	0.919615	0.00324193	up
BCA vs CK	IFM89_029861	0.623191	0.0032952	up
BCA vs CK	IFM89_000765	1.79237	0.00331532	up
BCA vs CK	IFM89_002789	5.87107	0.00346477	up
BCA vs CK	IFM89_020891	0.931451	0.00346477	up
BCA vs CK	IFM89_036827	1.89186	0.00356609	up
BCA vs CK	IFM89_032628	2.05878	0.00357171	up
BCA vs CK	IFM89_001400	1.42333	0.00359204	up
BCA vs CK	MSTRG.3010	2.5268	0.00369954	up
BCA vs CK	IFM89_034725	2.20278	0.00369954	up
BCA vs CK	IFM89_009835	0.42924	0.00369954	up
BCA vs CK	IFM89_028128	2.3206	0.00382134	up
BCA vs CK	IFM89_026005	1.93124	0.00382134	up
BCA vs CK	IFM89_031937	2.49868	0.00383397	up
BCA vs CK	IFM89_031069	0.94773	0.00383397	up
BCA vs CK	IFM89_038071	1.92157	0.00389592	up
BCA vs CK	IFM89_022797	0.409213	0.00389592	up
BCA vs CK	IFM89_003822	4.78489	0.00396057	up
BCA vs CK	IFM89_004082	1.7325	0.00396057	up
BCA vs CK	IFM89_031447	1.76456	0.00397593	up
BCA vs CK	IFM89_001078	1.80447	0.00420441	up
BCA vs CK	IFM89_023494	3.62514	0.00425252	up
BCA vs CK	MSTRG.42817	3.05043	0.00425252	up
BCA vs CK	IFM89_031826	2.05397	0.00429017	up
BCA vs CK	IFM89_036995	0.804565	0.00429017	up
BCA vs CK	IFM89_023083	0.841047	0.00441586	up
BCA vs CK	IFM89_019787	1.41723	0.00443417	up
BCA vs CK	IFM89_015063	4.34172	0.00444768	up
BCA vs CK	IFM89_016410	1.40585	0.00444768	up
BCA vs CK	IFM89_020033	0.684086	0.00444768	up
BCA vs CK	IFM89_037334	1.67867	0.00449721	up
BCA vs CK	IFM89_022936	1.64381	0.00459983	up
BCA vs CK	IFM89_033539	0.77837	0.00459983	up
BCA vs CK	IFM89_008715	1.55043	0.00467436	up
BCA vs CK	IFM89_039029	0.327951	0.00467518	up
BCA vs CK	IFM89_005215	0.59988	0.00479109	up
BCA vs CK	IFM89_007362	1.48859	0.00480633	up
BCA vs CK	MSTRG.19748	5.39919	0.00487069	up
BCA vs CK	MSTRG.42687	0.834872	0.00494706	up
BCA vs CK	IFM89_005129	2.31553	0.00500899	up
BCA vs CK	IFM89_035972	1.94055	0.00500899	up
BCA vs CK	IFM89_015458	1.55157	0.00500899	up
BCA vs CK	IFM89_015167	1.30098	0.00500899	up
BCA vs CK	IFM89_015218	0.822553	0.00500899	up
BCA vs CK	MSTRG.30500	3.20919	0.00537709	up
BCA vs CK	IFM89_020564	1.07305	0.00541598	up
BCA vs CK	IFM89_021723	0.41465	0.00546722	up
BCA vs CK	IFM89_029165	0.707444	0.00550832	up
BCA vs CK	IFM89_018957	0.583709	0.00581892	up
BCA vs CK	IFM89_003307	2.65987	0.00588795	up
BCA vs CK	IFM89_030568	2.19177	0.00591877	up
BCA vs CK	MSTRG.26974	0.698096	0.0059902	up
BCA vs CK	IFM89_010859	1.67225	0.00600817	up
BCA vs CK	IFM89_030888	1.66164	0.00600817	up
BCA vs CK	IFM89_007226	0.677624	0.0060136	up
BCA vs CK	IFM89_006083	0.855535	0.00610783	up
BCA vs CK	IFM89_013377	1.19713	0.00611832	up
BCA vs CK	IFM89_002321	2.53419	0.00616827	up
BCA vs CK	IFM89_035860	0.327839	0.00616827	up
BCA vs CK	IFM89_019115	0.899596	0.00635124	up
BCA vs CK	IFM89_022480	2.78198	0.00637875	up
BCA vs CK	IFM89_024725	1.26635	0.00639204	up
BCA vs CK	IFM89_035066	2.15639	0.00645964	up
BCA vs CK	IFM89_035082	1.83592	0.00645964	up
BCA vs CK	IFM89_016142	1.19856	0.00645964	up
BCA vs CK	IFM89_014563	1.18948	0.00645964	up
BCA vs CK	IFM89_010912	0.530326	0.00645964	up
BCA vs CK	IFM89_004615	0.348663	0.00645964	up
BCA vs CK	IFM89_024466	4.5851	0.00647818	up
BCA vs CK	IFM89_031813	1.70835	0.00658586	up
BCA vs CK	IFM89_022243	3.04582	0.00664925	up
BCA vs CK	MSTRG.9623	1.19083	0.00664925	up
BCA vs CK	IFM89_028409	1.17476	0.00664925	up
BCA vs CK	IFM89_020983	1.02035	0.00670203	up
BCA vs CK	IFM89_024724	1.2532	0.00679226	up
BCA vs CK	IFM89_022013	2.69769	0.00683601	up
BCA vs CK	IFM89_014249	0.349797	0.00694673	up
BCA vs CK	IFM89_022767	1.54968	0.00697801	up
BCA vs CK	IFM89_014380	1.85432	0.00699409	up
BCA vs CK	IFM89_013292	0.88643	0.00708006	up
BCA vs CK	IFM89_016698	1.87217	0.00714866	up
BCA vs CK	IFM89_007165	0.718482	0.00730395	up
BCA vs CK	IFM89_019069	3.42424	0.00734416	up
BCA vs CK	IFM89_015934	2.86676	0.00734416	up
BCA vs CK	IFM89_004718	0.77635	0.00734416	up
BCA vs CK	IFM89_029207	2.04781	0.00739656	up
BCA vs CK	IFM89_033797	0.721289	0.00757919	up
BCA vs CK	IFM89_038977	1.24692	0.00762428	up
BCA vs CK	MSTRG.35133	0.862782	0.00783537	up
BCA vs CK	IFM89_000754	0.520021	0.00788657	up
BCA vs CK	IFM89_001461	0.49188	0.00788657	up
BCA vs CK	IFM89_032629	0.396943	0.00788657	up
BCA vs CK	IFM89_023056	0.348656	0.00788657	up
BCA vs CK	IFM89_006915	0.757853	0.00810228	up
BCA vs CK	IFM89_039678	2.2675	0.00836799	up
BCA vs CK	IFM89_016713	1.11459	0.00867172	up
BCA vs CK	IFM89_027850	1.10913	0.00871237	up
BCA vs CK	IFM89_011926	1.44866	0.00902714	up
BCA vs CK	IFM89_037229	0.573742	0.00902714	up
BCA vs CK	IFM89_012883	0.488882	0.00910535	up
BCA vs CK	IFM89_028093	3.32282	0.00916583	up
BCA vs CK	MSTRG.34018	1.54081	0.00916583	up
BCA vs CK	IFM89_004629	0.635163	0.00916583	up
BCA vs CK	IFM89_010175	0.445926	0.00923382	up
BCA vs CK	IFM89_025053	0.720342	0.00931851	up
BCA vs CK	IFM89_036916	0.300638	0.00933227	up
BCA vs CK	IFM89_007595	1.44694	0.00937909	up
BCA vs CK	IFM89_002377	3.9955	0.0094617	up
BCA vs CK	IFM89_020706	0.501577	0.00953994	up
BCA vs CK	IFM89_008013	1.16978	0.0095527	up
BCA vs CK	MSTRG.4356	2.06602	0.00963024	up
BCA vs CK	IFM89_032000	1.60965	0.00963024	up
BCA vs CK	IFM89_004142	1.1576	0.00963024	up
BCA vs CK	IFM89_018003	0.603674	0.00963024	up
BCA vs CK	IFM89_016882	0.399616	0.00963024	up
BCA vs CK	IFM89_002350	0.442453	0.00968979	up
BCA vs CK	IFM89_016327	1.19499	0.0098078	up
BCA vs CK	IFM89_003729	0.905262	0.00982056	up
BCA vs CK	IFM89_010023	1.23192	0.00999483	up
BCA vs CK	IFM89_020080	1.0988	0.0100047	up
BCA vs CK	IFM89_012799	0.961118	0.0100047	up
BCA vs CK	IFM89_014727	1.93035	0.010119	up
BCA vs CK	IFM89_022002	1.33137	0.010119	up
BCA vs CK	MSTRG.6241	4.5022	0.0101246	up
BCA vs CK	IFM89_005862	0.436241	0.0103527	up
BCA vs CK	IFM89_022953	0.812044	0.0104051	up
BCA vs CK	IFM89_033660	1.63301	0.0104805	up
BCA vs CK	IFM89_038957	4.41085	0.0105483	up
BCA vs CK	IFM89_031902	4.17589	0.010632	up
BCA vs CK	IFM89_029831	0.54115	0.010632	up
BCA vs CK	IFM89_009139	0.432817	0.0107962	up
BCA vs CK	IFM89_002138	1.23526	0.0108287	up
BCA vs CK	IFM89_028187	0.848057	0.0109389	up
BCA vs CK	IFM89_017670	1.28891	0.0111555	up
BCA vs CK	IFM89_011367	1.17562	0.0111555	up
BCA vs CK	IFM89_038341	1.08618	0.0112432	up
BCA vs CK	IFM89_015843	0.275739	0.0113569	up
BCA vs CK	IFM89_016470	2.91398	0.0113939	up
BCA vs CK	IFM89_018974	0.60798	0.0114814	up
BCA vs CK	IFM89_002743	1.48534	0.0115864	up
BCA vs CK	IFM89_037381	1.39232	0.0115864	up
BCA vs CK	IFM89_027938	1.2924	0.0116426	up
BCA vs CK	IFM89_025805	3.83079	0.0117273	up
BCA vs CK	IFM89_005972	0.852569	0.0118258	up
BCA vs CK	IFM89_000901	0.665763	0.0119349	up
BCA vs CK	IFM89_000377	1.22692	0.0120429	up
BCA vs CK	IFM89_007456	3.26705	0.0120828	up
BCA vs CK	IFM89_017969	1.48184	0.0120828	up
BCA vs CK	IFM89_028525	0.522215	0.0120828	up
BCA vs CK	MSTRG.1927	3.44401	0.0123487	up
BCA vs CK	IFM89_025526	0.478889	0.0123487	up
BCA vs CK	MSTRG.16213	3.73583	0.0123833	up
BCA vs CK	IFM89_002742	1.18571	0.0123833	up
BCA vs CK	IFM89_010328	2.91711	0.0125016	up
BCA vs CK	IFM89_023040	0.631321	0.0125967	up
BCA vs CK	IFM89_029842	1.48001	0.0126103	up
BCA vs CK	IFM89_034200	5.93411	0.0126991	up
BCA vs CK	IFM89_009210	0.570827	0.0127899	up
BCA vs CK	IFM89_015884	0.448808	0.0129776	up
BCA vs CK	IFM89_032584	0.412708	0.0129776	up
BCA vs CK	IFM89_003642	1.40802	0.0131783	up
BCA vs CK	IFM89_001090	0.587	0.0131783	up
BCA vs CK	MSTRG.28470	3.55002	0.0133239	up
BCA vs CK	IFM89_013165	0.681135	0.0133239	up
BCA vs CK	IFM89_006914	1.58916	0.0136701	up
BCA vs CK	MSTRG.11172	3.70174	0.0137842	up
BCA vs CK	IFM89_027568	0.686178	0.0137842	up
BCA vs CK	IFM89_004104	0.51911	0.0137842	up
BCA vs CK	IFM89_010586	0.438199	0.0138581	up
BCA vs CK	IFM89_024044	1.04788	0.0138882	up
BCA vs CK	IFM89_021666	1.51702	0.0143182	up
BCA vs CK	IFM89_002562	0.778221	0.0143971	up
BCA vs CK	IFM89_016560	0.571634	0.0144855	up
BCA vs CK	IFM89_026515	5.24479	0.0147415	up
BCA vs CK	IFM89_025210	1.80219	0.0147798	up
BCA vs CK	IFM89_030340	0.435177	0.0147798	up
BCA vs CK	IFM89_033661	2.10815	0.014895	up
BCA vs CK	IFM89_000621	0.968206	0.0149403	up
BCA vs CK	IFM89_028964	1.96096	0.0150001	up
BCA vs CK	IFM89_005231	1.71751	0.0150443	up
BCA vs CK	MSTRG.22986	0.853436	0.015172	up
BCA vs CK	IFM89_022686	1.38178	0.0152315	up
BCA vs CK	IFM89_038365	3.31595	0.0152358	up
BCA vs CK	IFM89_009806	0.551267	0.0152358	up
BCA vs CK	IFM89_035289	1.13854	0.0153138	up
BCA vs CK	IFM89_038584	1.65141	0.0153712	up
BCA vs CK	IFM89_033667	3.17645	0.0154537	up
BCA vs CK	IFM89_017399	0.309847	0.0154537	up
BCA vs CK	IFM89_005960	1.42373	0.016083	up
BCA vs CK	IFM89_007685	1.74202	0.0162064	up
BCA vs CK	IFM89_037681	0.91533	0.0165145	up
BCA vs CK	IFM89_028246	0.496086	0.0165498	up
BCA vs CK	IFM89_036106	0.38924	0.0166524	up
BCA vs CK	IFM89_034548	1.46174	0.016715	up
BCA vs CK	MSTRG.19430	0.986294	0.0167774	up
BCA vs CK	IFM89_013160	0.903801	0.0168527	up
BCA vs CK	IFM89_002616	0.678894	0.0168576	up
BCA vs CK	IFM89_013511	1.07126	0.0169652	up
BCA vs CK	IFM89_014245	1.06932	0.0170792	up
BCA vs CK	IFM89_013752	0.872005	0.0170792	up
BCA vs CK	IFM89_021018	2.65131	0.0174916	up
BCA vs CK	IFM89_006194	1.19771	0.0175209	up
BCA vs CK	IFM89_009539	0.51392	0.0175658	up
BCA vs CK	IFM89_002752	0.318846	0.0175922	up
BCA vs CK	IFM89_003711	0.4368	0.0176919	up
BCA vs CK	IFM89_002378	2.77167	0.0177516	up
BCA vs CK	IFM89_014011	0.808552	0.0177516	up
BCA vs CK	IFM89_035272	0.381665	0.0177604	up
BCA vs CK	IFM89_020467	0.899736	0.0177881	up
BCA vs CK	IFM89_033835	1.19074	0.01792	up
BCA vs CK	IFM89_029167	0.644678	0.0180954	up
BCA vs CK	IFM89_010138	2.15345	0.0182142	up
BCA vs CK	IFM89_008316	1.53948	0.0182142	up
BCA vs CK	IFM89_011375	1.4918	0.0182142	up
BCA vs CK	IFM89_016412	0.345231	0.0182142	up
BCA vs CK	IFM89_016708	0.533299	0.0182217	up
BCA vs CK	IFM89_018734	0.379164	0.0182389	up
BCA vs CK	IFM89_015064	1.61369	0.0183342	up
BCA vs CK	MSTRG.39102	1.68563	0.018341	up
BCA vs CK	IFM89_029698	1.41626	0.018341	up
BCA vs CK	IFM89_006839	0.540287	0.018341	up
BCA vs CK	IFM89_034739	0.405081	0.018341	up
BCA vs CK	IFM89_022052	0.385915	0.018341	up
BCA vs CK	IFM89_003129	0.332874	0.018341	up
BCA vs CK	IFM89_026206	0.659072	0.0183525	up
BCA vs CK	IFM89_004950	5.08347	0.0184071	up
BCA vs CK	IFM89_013910	0.86413	0.0184071	up
BCA vs CK	IFM89_031947	2.60248	0.0191288	up
BCA vs CK	IFM89_018721	0.810842	0.0191288	up
BCA vs CK	IFM89_009786	0.684605	0.019165	up
BCA vs CK	IFM89_030296	1.71026	0.0192596	up
BCA vs CK	IFM89_033523	0.341616	0.0193755	up
BCA vs CK	IFM89_011715	0.725503	0.019449	up
BCA vs CK	IFM89_025804	3.86139	0.0195847	up
BCA vs CK	IFM89_011689	1.10233	0.0195847	up
BCA vs CK	IFM89_037354	0.303831	0.0195847	up
BCA vs CK	IFM89_025473	0.28521	0.0195847	up
BCA vs CK	IFM89_030978	0.560027	0.0196534	up
BCA vs CK	IFM89_018236	0.295721	0.0197577	up
BCA vs CK	IFM89_017374	0.352478	0.0197952	up
BCA vs CK	MSTRG.38708	3.61915	0.0198521	up
BCA vs CK	IFM89_033647	2.10103	0.0198521	up
BCA vs CK	MSTRG.32330	4.62761	0.0198963	up
BCA vs CK	IFM89_001159	0.740133	0.0198963	up
BCA vs CK	IFM89_014080	1.29868	0.0199503	up
BCA vs CK	MSTRG.29222	2.94394	0.0200794	up
BCA vs CK	IFM89_038830	1.56716	0.0200794	up
BCA vs CK	IFM89_026490	0.582829	0.0201154	up
BCA vs CK	IFM89_006723	0.551655	0.0201708	up
BCA vs CK	IFM89_018252	0.418025	0.0203983	up
BCA vs CK	IFM89_001938	2.80712	0.0205359	up
BCA vs CK	IFM89_026117	0.529599	0.0205826	up
BCA vs CK	IFM89_031714	0.608205	0.0207364	up
BCA vs CK	IFM89_029771	0.530184	0.0207364	up
BCA vs CK	IFM89_036656	4.39388	0.0209138	up
BCA vs CK	IFM89_032988	0.492141	0.0211032	up
BCA vs CK	IFM89_021483	1.76086	0.0212447	up
BCA vs CK	IFM89_008669	1.37689	0.0212447	up
BCA vs CK	IFM89_007117	1.34657	0.0212447	up
BCA vs CK	IFM89_023122	0.522616	0.0212447	up
BCA vs CK	MSTRG.9119	3.5337	0.0213401	up
BCA vs CK	MSTRG.40919	0.825279	0.0214419	up
BCA vs CK	IFM89_026104	1.56188	0.0215785	up
BCA vs CK	IFM89_037337	1.8316	0.0216448	up
BCA vs CK	IFM89_024360	0.423158	0.0217643	up
BCA vs CK	IFM89_023134	3.19964	0.0218052	up
BCA vs CK	IFM89_002775	0.329628	0.0220434	up
BCA vs CK	IFM89_025864	1.77118	0.0221937	up
BCA vs CK	IFM89_002174	1.17609	0.0225802	up
BCA vs CK	IFM89_015248	0.526954	0.0226871	up
BCA vs CK	MSTRG.42076	1.63309	0.0227328	up
BCA vs CK	IFM89_011698	5.23284	0.0234167	up
BCA vs CK	IFM89_009235	0.443462	0.0234167	up
BCA vs CK	IFM89_002744	0.40218	0.0234167	up
BCA vs CK	MSTRG.36987	4.07238	0.023424	up
BCA vs CK	IFM89_003725	1.33986	0.023424	up
BCA vs CK	IFM89_024100	1.13401	0.0237072	up
BCA vs CK	IFM89_020670	0.322104	0.0237072	up
BCA vs CK	IFM89_034554	1.47218	0.0237696	up
BCA vs CK	IFM89_005189	3.70481	0.0238304	up
BCA vs CK	IFM89_028316	1.32117	0.0238916	up
BCA vs CK	IFM89_026614	1.79621	0.0239873	up
BCA vs CK	MSTRG.29550	3.64367	0.0240953	up
BCA vs CK	MSTRG.2947	3.03867	0.0240953	up
BCA vs CK	IFM89_018383	0.764998	0.0240953	up
BCA vs CK	IFM89_019821	1.54909	0.0243737	up
BCA vs CK	IFM89_005056	0.901869	0.0243799	up
BCA vs CK	IFM89_033387	0.697294	0.0245011	up
BCA vs CK	IFM89_001196	0.389032	0.024628	up
BCA vs CK	IFM89_030161	1.87593	0.0249228	up
BCA vs CK	IFM89_037624	3.66066	0.0249478	up
BCA vs CK	IFM89_020364	1.00464	0.024984	up
BCA vs CK	IFM89_024325	0.405092	0.0252386	up
BCA vs CK	IFM89_000611	0.437187	0.0253301	up
BCA vs CK	IFM89_002111	1.2706	0.0254322	up
BCA vs CK	IFM89_038276	1.11241	0.0254322	up
BCA vs CK	IFM89_005771	1.19746	0.0254616	up
BCA vs CK	IFM89_016316	3.43482	0.0260608	up
BCA vs CK	IFM89_028429	2.03481	0.0260608	up
BCA vs CK	IFM89_036152	1.74511	0.0261068	up
BCA vs CK	MSTRG.2407	4.79199	0.0262989	up
BCA vs CK	IFM89_018723	2.79018	0.0264703	up
BCA vs CK	IFM89_009772	1.9773	0.026847	up
BCA vs CK	IFM89_032916	2.09954	0.0270709	up
BCA vs CK	IFM89_000781	1.04219	0.0271041	up
BCA vs CK	IFM89_000058	0.490021	0.0271839	up
BCA vs CK	MSTRG.25528	1.26306	0.0274423	up
BCA vs CK	IFM89_028287	0.891527	0.0274423	up
BCA vs CK	IFM89_005363	0.664948	0.0275362	up
BCA vs CK	IFM89_009199	0.309185	0.0277094	up
BCA vs CK	IFM89_006643	0.432065	0.0280072	up
BCA vs CK	IFM89_023845	0.883045	0.0282759	up
BCA vs CK	MSTRG.11319	3.17572	0.0284417	up
BCA vs CK	IFM89_003574	1.22641	0.0284417	up
BCA vs CK	IFM89_026582	0.924366	0.0285703	up
BCA vs CK	IFM89_019057	1.09709	0.0286658	up
BCA vs CK	IFM89_030451	0.320935	0.0289152	up
BCA vs CK	IFM89_029829	0.345577	0.0289431	up
BCA vs CK	MSTRG.42288	0.610035	0.0289566	up
BCA vs CK	IFM89_002105	2.0859	0.0291863	up
BCA vs CK	IFM89_007063	0.354348	0.0291863	up
BCA vs CK	IFM89_031416	3.39928	0.0298417	up
BCA vs CK	IFM89_025136	1.56888	0.0298417	up
BCA vs CK	IFM89_033269	1.3955	0.0298417	up
BCA vs CK	IFM89_001583	1.05903	0.0298417	up
BCA vs CK	IFM89_033009	0.504833	0.0298417	up
BCA vs CK	IFM89_033182	0.495167	0.0298417	up
BCA vs CK	IFM89_026728	0.392238	0.0298417	up
BCA vs CK	IFM89_013677	3.70999	0.0298459	up
BCA vs CK	IFM89_005287	0.99854	0.0298459	up
BCA vs CK	MSTRG.41933	0.470021	0.0303389	up
BCA vs CK	IFM89_025011	2.85434	0.0304258	up
BCA vs CK	MSTRG.42659	0.376446	0.0307063	up
BCA vs CK	IFM89_005532	4.2427	0.0307603	up
BCA vs CK	IFM89_006308	1.8136	0.0307603	up
BCA vs CK	IFM89_035079	0.374172	0.0307603	up
BCA vs CK	IFM89_025365	0.690345	0.0309133	up
BCA vs CK	IFM89_014236	0.399467	0.0309133	up
BCA vs CK	IFM89_005274	1.8017	0.0309153	up
BCA vs CK	IFM89_033475	1.8334	0.0311917	up
BCA vs CK	IFM89_025433	0.792836	0.0312376	up
BCA vs CK	IFM89_010017	0.394083	0.0312376	up
BCA vs CK	IFM89_002968	0.386859	0.0312376	up
BCA vs CK	IFM89_033930	0.537766	0.0313833	up
BCA vs CK	IFM89_038324	4.21738	0.0315076	up
BCA vs CK	IFM89_009541	0.443979	0.0315386	up
BCA vs CK	IFM89_023762	0.592492	0.0316088	up
BCA vs CK	IFM89_013808	1.83235	0.0316894	up
BCA vs CK	IFM89_018591	0.88752	0.0316894	up
BCA vs CK	IFM89_025246	0.419426	0.0320122	up
BCA vs CK	IFM89_035755	0.451946	0.0323487	up
BCA vs CK	IFM89_025386	2.58526	0.0324636	up
BCA vs CK	IFM89_006086	0.881264	0.0324636	up
BCA vs CK	MSTRG.21398	3.21144	0.0324779	up
BCA vs CK	IFM89_003025	1.52867	0.0325405	up
BCA vs CK	IFM89_033958	0.365383	0.0325627	up
BCA vs CK	IFM89_037380	0.789366	0.0325947	up
BCA vs CK	IFM89_022443	0.447342	0.0326531	up
BCA vs CK	IFM89_023508	0.670054	0.0326666	up
BCA vs CK	IFM89_032582	0.969794	0.032936	up
BCA vs CK	IFM89_025428	0.497306	0.0329405	up
BCA vs CK	IFM89_033264	0.423772	0.0329783	up
BCA vs CK	MSTRG.33986	2.08041	0.0333318	up
BCA vs CK	IFM89_011232	1.13604	0.033345	up
BCA vs CK	IFM89_015293	0.551551	0.033345	up
BCA vs CK	IFM89_033279	0.490651	0.033345	up
BCA vs CK	IFM89_020762	4.60562	0.0333861	up
BCA vs CK	IFM89_030432	1.30443	0.0334599	up
BCA vs CK	IFM89_008016	0.360642	0.0336638	up
BCA vs CK	IFM89_023155	1.05057	0.034146	up
BCA vs CK	IFM89_007957	0.454695	0.0342717	up
BCA vs CK	IFM89_000095	0.475101	0.03435	up
BCA vs CK	IFM89_009544	0.814148	0.0345944	up
BCA vs CK	IFM89_032945	4.74777	0.0347159	up
BCA vs CK	IFM89_028102	3.33456	0.0347159	up
BCA vs CK	IFM89_038958	3.28203	0.0347159	up
BCA vs CK	IFM89_008616	0.369621	0.0347159	up
BCA vs CK	IFM89_018871	2.13876	0.035145	up
BCA vs CK	IFM89_010636	0.459895	0.035383	up
BCA vs CK	IFM89_033087	0.35374	0.035383	up
BCA vs CK	IFM89_035616	0.285203	0.0354026	up
BCA vs CK	MSTRG.4685	4.02537	0.0355111	up
BCA vs CK	IFM89_026323	1.35285	0.0355111	up
BCA vs CK	IFM89_025653	0.44855	0.0355111	up
BCA vs CK	MSTRG.42726	0.374264	0.0357497	up
BCA vs CK	MSTRG.16780	2.35265	0.0359871	up
BCA vs CK	IFM89_014621	3.14827	0.0359977	up
BCA vs CK	IFM89_028252	3.19166	0.0360508	up
BCA vs CK	IFM89_002192	1.4933	0.0360508	up
BCA vs CK	MSTRG.20815	4.47871	0.0363919	up
BCA vs CK	IFM89_004668	2.16495	0.0364965	up
BCA vs CK	MSTRG.31981	1.12576	0.0365905	up
BCA vs CK	MSTRG.14567	3.22805	0.0369368	up
BCA vs CK	IFM89_018563	0.348812	0.0369368	up
BCA vs CK	IFM89_027941	2.664	0.0371071	up
BCA vs CK	MSTRG.42115	0.469126	0.0371071	up
BCA vs CK	IFM89_036373	0.762403	0.0373781	up
BCA vs CK	IFM89_039960	3.58983	0.0375656	up
BCA vs CK	IFM89_037042	2.69511	0.0375656	up
BCA vs CK	IFM89_009505	0.533351	0.0376087	up
BCA vs CK	IFM89_018290	0.637049	0.0377769	up
BCA vs CK	IFM89_004044	0.684571	0.0378232	up
BCA vs CK	IFM89_020416	0.966116	0.0379061	up
BCA vs CK	IFM89_009094	0.298597	0.0379061	up
BCA vs CK	IFM89_007983	1.49708	0.0380335	up
BCA vs CK	IFM89_027578	1.08881	0.0384455	up
BCA vs CK	IFM89_023060	0.447507	0.0387906	up
BCA vs CK	IFM89_004763	1.13591	0.0388569	up
BCA vs CK	IFM89_029792	3.09299	0.0390425	up
BCA vs CK	IFM89_010116	2.8027	0.0390425	up
BCA vs CK	IFM89_010424	0.857972	0.0390425	up
BCA vs CK	IFM89_016093	3.46527	0.0392286	up
BCA vs CK	IFM89_035235	1.20207	0.0393198	up
BCA vs CK	IFM89_028517	0.992557	0.0393423	up
BCA vs CK	IFM89_024345	1.61738	0.0393545	up
BCA vs CK	IFM89_025536	0.623107	0.0395125	up
BCA vs CK	IFM89_005075	0.36479	0.0395504	up
BCA vs CK	MSTRG.42035	0.289718	0.039714	up
BCA vs CK	MSTRG.37173	2.9169	0.0398689	up
BCA vs CK	IFM89_023577	0.273995	0.0399561	up
BCA vs CK	IFM89_036207	0.968923	0.0401779	up
BCA vs CK	IFM89_006203	0.271206	0.0409399	up
BCA vs CK	IFM89_016878	2.52454	0.0409634	up
BCA vs CK	IFM89_028263	0.751082	0.0409634	up
BCA vs CK	IFM89_009877	0.325345	0.04113	up
BCA vs CK	IFM89_005301	0.529092	0.0416081	up
BCA vs CK	IFM89_014552	0.325646	0.0416494	up
BCA vs CK	IFM89_025668	2.70763	0.0419017	up
BCA vs CK	IFM89_005320	0.327759	0.0419017	up
BCA vs CK	IFM89_032419	2.22092	0.0422754	up
BCA vs CK	IFM89_001628	1.14615	0.0426576	up
BCA vs CK	IFM89_013909	1.51322	0.042926	up
BCA vs CK	IFM89_015071	1.25913	0.0431061	up
BCA vs CK	MSTRG.10006	4.38651	0.0433884	up
BCA vs CK	IFM89_037195	0.573363	0.0434081	up
BCA vs CK	IFM89_005237	1.0254	0.0434207	up
BCA vs CK	IFM89_005973	1.21141	0.0436276	up
BCA vs CK	MSTRG.2160	4.06073	0.0437147	up
BCA vs CK	IFM89_018119	1.64886	0.0437147	up
BCA vs CK	IFM89_008002	1.16376	0.0437653	up
BCA vs CK	MSTRG.40378	1.09159	0.0437653	up
BCA vs CK	IFM89_014602	0.47257	0.0437653	up
BCA vs CK	IFM89_020129	0.752825	0.0439655	up
BCA vs CK	IFM89_004650	0.359862	0.0439655	up
BCA vs CK	IFM89_021579	1.56682	0.0441023	up
BCA vs CK	IFM89_000678	0.774533	0.0442856	up
BCA vs CK	IFM89_026016	1.12411	0.0445264	up
BCA vs CK	IFM89_012891	0.914828	0.0446337	up
BCA vs CK	IFM89_034335	0.831262	0.0451579	up
BCA vs CK	IFM89_021049	3.42629	0.0455747	up
BCA vs CK	IFM89_028822	0.641265	0.0459203	up
BCA vs CK	IFM89_018803	1.99994	0.0460171	up
BCA vs CK	IFM89_026004	1.50059	0.0460463	up
BCA vs CK	IFM89_033983	0.78568	0.046105	up
BCA vs CK	IFM89_024033	3.70766	0.046227	up
BCA vs CK	IFM89_008131	0.582041	0.046227	up
BCA vs CK	IFM89_026228	0.708113	0.046633	up
BCA vs CK	IFM89_038388	0.346029	0.046633	up
BCA vs CK	IFM89_039491	0.443621	0.0466832	up
BCA vs CK	IFM89_021510	0.413533	0.0466832	up
BCA vs CK	IFM89_005345	1.55711	0.0468194	up
BCA vs CK	IFM89_017251	0.389012	0.0468691	up
BCA vs CK	IFM89_012204	0.609204	0.0470229	up
BCA vs CK	IFM89_035935	1.55966	0.0473214	up
BCA vs CK	IFM89_009830	0.501404	0.0475026	up
BCA vs CK	IFM89_005024	3.41471	0.0475593	up
BCA vs CK	MSTRG.11320	2.98758	0.0475593	up
BCA vs CK	IFM89_020308	1.41954	0.0475593	up
BCA vs CK	IFM89_037014	0.894945	0.0475593	up
BCA vs CK	IFM89_006888	1.09086	0.0477724	up
BCA vs CK	IFM89_029477	0.90855	0.0477724	up
BCA vs CK	IFM89_001685	0.323619	0.0477724	up
BCA vs CK	IFM89_038397	0.620569	0.047818	up
BCA vs CK	IFM89_004907	4.44297	0.047968	up
BCA vs CK	IFM89_025967	0.973661	0.047968	up
BCA vs CK	IFM89_014084	0.901487	0.04809	up
BCA vs CK	IFM89_023560	3.1545	0.0481752	up
BCA vs CK	IFM89_017169	1.50348	0.0481752	up
BCA vs CK	IFM89_018682	1.54638	0.0482088	up
BCA vs CK	IFM89_015455	0.401488	0.0482088	up
BCA vs CK	IFM89_005297	2.06765	0.0482222	up
BCA vs CK	IFM89_035225	1.45821	0.0485869	up
BCA vs CK	IFM89_026140	0.385943	0.0485869	up
BCA vs CK	IFM89_007460	0.447521	0.0487871	up
BCA vs CK	IFM89_036460	0.65549	0.0490964	up
BCA vs CK	IFM89_005255	0.3132	0.0492644	up
BCA vs CK	IFM89_002076	2.14223	0.0493105	up
BCA vs CK	IFM89_037967	1.12728	0.0493105	up
BCA vs CK	IFM89_028312	0.388686	0.0493105	up
BCA vs CK	IFM89_009920	1.84057	0.0494524	up
BCA vs CK	IFM89_028755	3.01498	0.0494795	up
BCA vs CK	IFM89_030805	0.501638	0.0494795	up
BCA vs CK	IFM89_003052	1.03008	0.0496266	up
BCA vs CK	IFM89_035042	1.0197	0.0496266	up
BCA vs CK	IFM89_026827	0.404842	0.0496266	up
BCA vs CK	IFM89_025761	0.288176	0.0496266	up
BCA vs CK	IFM89_024273	0.962194	0.0498622	up
BCA vs CK	IFM89_010387	2.07743	0.0499126	up
BCA vs CK	MSTRG.18411	-3.46021	1.30837e-09	down
BCA vs CK	MSTRG.31080	-3.15869	4.88038e-06	down
BCA vs CK	MSTRG.42516	-0.821692	3.09749e-05	down
BCA vs CK	IFM89_020340	-1.71287	0.000410799	down
BCA vs CK	IFM89_006971	-1.51222	0.000446036	down
BCA vs CK	MSTRG.36624	-3.40642	0.00048308	down
BCA vs CK	IFM89_021450	-5.49787	0.000634179	down
BCA vs CK	MSTRG.43327	-2.99989	0.000634179	down
BCA vs CK	IFM89_005165	-4.39463	0.000671881	down
BCA vs CK	IFM89_029518	-1.04352	0.000749457	down
BCA vs CK	IFM89_028035	-5.10847	0.000754798	down
BCA vs CK	IFM89_039954	-7.85772	0.000805238	down
BCA vs CK	IFM89_021042	-5.29065	0.000815874	down
BCA vs CK	IFM89_020633	-2.5262	0.000835677	down
BCA vs CK	IFM89_017329	-0.977564	0.000835677	down
BCA vs CK	IFM89_020556	-3.92625	0.000840329	down
BCA vs CK	IFM89_002570	-2.61913	0.000925234	down
BCA vs CK	IFM89_026041	-6.54936	0.000955273	down
BCA vs CK	MSTRG.39864	-5.26498	0.0010447	down
BCA vs CK	MSTRG.731	-7.26618	0.00105758	down
BCA vs CK	MSTRG.40228	-4.30341	0.0012677	down
BCA vs CK	IFM89_036976	-2.57556	0.0012677	down
BCA vs CK	IFM89_010152	-1.85847	0.0012677	down
BCA vs CK	IFM89_033584	-3.03833	0.00128811	down
BCA vs CK	MSTRG.3406	-6.95961	0.00135723	down
BCA vs CK	IFM89_035647	-4.07571	0.00155015	down
BCA vs CK	MSTRG.43373	-4.56579	0.00162432	down
BCA vs CK	IFM89_022517	-0.437403	0.00166504	down
BCA vs CK	IFM89_011197	-0.603129	0.00212248	down
BCA vs CK	IFM89_038570	-1.10946	0.00212518	down
BCA vs CK	IFM89_039953	-6.43147	0.00214614	down
BCA vs CK	IFM89_006273	-1.11547	0.00214787	down
BCA vs CK	MSTRG.38976	-0.927701	0.00228443	down
BCA vs CK	MSTRG.36513	-1.61152	0.00259928	down
BCA vs CK	IFM89_015723	-1.88125	0.00265711	down
BCA vs CK	IFM89_013598	-1.18253	0.00269485	down
BCA vs CK	MSTRG.30607	-5.54122	0.00274744	down
BCA vs CK	IFM89_005541	-0.554633	0.00285184	down
BCA vs CK	MSTRG.19217	-2.913	0.00324193	down
BCA vs CK	IFM89_035518	-1.85583	0.0032952	down
BCA vs CK	IFM89_020963	-1.47768	0.0032952	down
BCA vs CK	IFM89_017336	-0.299566	0.00331915	down
BCA vs CK	MSTRG.18164	-4.74252	0.00369954	down
BCA vs CK	IFM89_013664	-1.40663	0.00369954	down
BCA vs CK	IFM89_010670	-0.956259	0.00369954	down
BCA vs CK	IFM89_004883	-0.835649	0.00375939	down
BCA vs CK	MSTRG.1765	-6.51267	0.00382134	down
BCA vs CK	MSTRG.7075	-4.21189	0.00407616	down
BCA vs CK	IFM89_020360	-0.822831	0.00423729	down
BCA vs CK	MSTRG.22763	-5.77995	0.00430819	down
BCA vs CK	IFM89_027732	-0.525433	0.00443417	down
BCA vs CK	IFM89_001253	-2.63111	0.00487069	down
BCA vs CK	IFM89_003866	-3.84644	0.00494706	down
BCA vs CK	MSTRG.17639	-5.22803	0.00496244	down
BCA vs CK	MSTRG.17443	-4.96489	0.00518402	down
BCA vs CK	IFM89_036724	-1.46744	0.00583903	down
BCA vs CK	IFM89_006760	-1.59468	0.00591123	down
BCA vs CK	IFM89_003374	-0.569427	0.00600581	down
BCA vs CK	IFM89_027926	-3.53286	0.00600817	down
BCA vs CK	IFM89_033415	-0.801155	0.00610783	down
BCA vs CK	MSTRG.28754	-4.42553	0.00618453	down
BCA vs CK	MSTRG.1254	-3.86087	0.00639204	down
BCA vs CK	IFM89_010327	-4.22561	0.00645964	down
BCA vs CK	MSTRG.37749	-6.39627	0.00664925	down
BCA vs CK	MSTRG.6982	-4.01805	0.00664925	down
BCA vs CK	MSTRG.5780	-0.542466	0.00664925	down
BCA vs CK	IFM89_009710	-2.69235	0.00679226	down
BCA vs CK	MSTRG.20937	-1.04872	0.00679226	down
BCA vs CK	IFM89_036698	-1.36039	0.00736956	down
BCA vs CK	IFM89_031683	-1.22476	0.0074664	down
BCA vs CK	IFM89_034403	-1.10325	0.0075988	down
BCA vs CK	MSTRG.30516	-4.11814	0.00788657	down
BCA vs CK	IFM89_008714	-2.52525	0.00788657	down
BCA vs CK	IFM89_039552	-1.40618	0.00814367	down
BCA vs CK	IFM89_020635	-2.69043	0.00847428	down
BCA vs CK	IFM89_020332	-0.375182	0.00911171	down
BCA vs CK	IFM89_001943	-4.92865	0.00931851	down
BCA vs CK	IFM89_012827	-7.08694	0.00933227	down
BCA vs CK	IFM89_004073	-5.06002	0.00963024	down
BCA vs CK	MSTRG.29362	-3.91222	0.00963024	down
BCA vs CK	IFM89_033967	-1.33174	0.00963024	down
BCA vs CK	MSTRG.7916	-1.19549	0.00963024	down
BCA vs CK	MSTRG.33176	-3.94907	0.00970574	down
BCA vs CK	IFM89_010566	-4.52291	0.0097772	down
BCA vs CK	MSTRG.39587	-1.48472	0.0097772	down
BCA vs CK	IFM89_039586	-0.667067	0.0100047	down
BCA vs CK	IFM89_038488	-0.882514	0.0102212	down
BCA vs CK	IFM89_021813	-0.985221	0.0103268	down
BCA vs CK	IFM89_014510	-1.10254	0.010571	down
BCA vs CK	IFM89_013772	-1.61905	0.0106027	down
BCA vs CK	IFM89_011619	-0.788254	0.0106529	down
BCA vs CK	IFM89_026779	-1.01023	0.0107171	down
BCA vs CK	IFM89_025049	-1.64009	0.0108287	down
BCA vs CK	IFM89_036442	-1.40385	0.0108287	down
BCA vs CK	IFM89_036616	-3.92565	0.0111555	down
BCA vs CK	IFM89_003231	-3.09817	0.0114867	down
BCA vs CK	IFM89_036699	-2.34418	0.0115864	down
BCA vs CK	IFM89_005241	-1.0178	0.0117273	down
BCA vs CK	MSTRG.36258	-2.37833	0.0118258	down
BCA vs CK	IFM89_011071	-1.83241	0.0118258	down
BCA vs CK	MSTRG.38993	-6.43699	0.0118488	down
BCA vs CK	MSTRG.34738	-4.46889	0.0120828	down
BCA vs CK	IFM89_030985	-0.91711	0.0122939	down
BCA vs CK	IFM89_036795	-1.78981	0.0123487	down
BCA vs CK	IFM89_023200	-5.13055	0.0123833	down
BCA vs CK	MSTRG.6964	-0.727973	0.0123833	down
BCA vs CK	IFM89_026855	-1.42049	0.0125967	down
BCA vs CK	IFM89_034666	-2.27012	0.0126809	down
BCA vs CK	MSTRG.20108	-3.67015	0.0129776	down
BCA vs CK	MSTRG.6516	-3.44243	0.0129776	down
BCA vs CK	IFM89_005171	-0.920626	0.0136701	down
BCA vs CK	IFM89_012808	-2.0126	0.0137842	down
BCA vs CK	IFM89_003921	-2.09968	0.0138581	down
BCA vs CK	IFM89_033726	-1.00659	0.0143182	down
BCA vs CK	IFM89_016198	-1.26591	0.0144603	down
BCA vs CK	MSTRG.39193	-0.994526	0.0146759	down
BCA vs CK	IFM89_026367	-0.679315	0.0147024	down
BCA vs CK	IFM89_011960	-0.43538	0.0147819	down
BCA vs CK	IFM89_019134	-0.928647	0.0148018	down
BCA vs CK	MSTRG.10339	-2.97646	0.0149403	down
BCA vs CK	IFM89_023105	-0.830149	0.0149888	down
BCA vs CK	IFM89_021263	-0.821894	0.015191	down
BCA vs CK	MSTRG.31171	-5.09296	0.0157241	down
BCA vs CK	MSTRG.40792	-3.55506	0.0158524	down
BCA vs CK	IFM89_039409	-1.66728	0.0159153	down
BCA vs CK	MSTRG.14675	-1.90493	0.015954	down
BCA vs CK	IFM89_032832	-2.61696	0.016017	down
BCA vs CK	MSTRG.14841	-4.08537	0.016083	down
BCA vs CK	MSTRG.28102	-1.68178	0.016083	down
BCA vs CK	MSTRG.23409	-4.98503	0.0165266	down
BCA vs CK	IFM89_011146	-3.98083	0.016715	down
BCA vs CK	IFM89_011903	-0.867136	0.016715	down
BCA vs CK	MSTRG.27998	-5.02627	0.0169652	down
BCA vs CK	IFM89_039592	-0.740331	0.0169652	down
BCA vs CK	IFM89_036191	-0.976718	0.0170792	down
BCA vs CK	MSTRG.32403	-2.97163	0.0177516	down
BCA vs CK	IFM89_019255	-0.512735	0.0179124	down
BCA vs CK	IFM89_004471	-4.65922	0.0181477	down
BCA vs CK	MSTRG.18675	-0.308163	0.0182217	down
BCA vs CK	MSTRG.10117	-4.20331	0.018341	down
BCA vs CK	IFM89_022238	-0.453422	0.0184374	down
BCA vs CK	IFM89_032331	-0.444567	0.0188242	down
BCA vs CK	IFM89_028203	-1.49338	0.0195847	down
BCA vs CK	IFM89_022129	-0.505842	0.0195847	down
BCA vs CK	IFM89_014992	-3.90395	0.0196168	down
BCA vs CK	MSTRG.38248	-5.348	0.0196534	down
BCA vs CK	MSTRG.41122	-4.17912	0.0196534	down
BCA vs CK	IFM89_009211	-0.732839	0.0196534	down
BCA vs CK	MSTRG.39229	-4.43928	0.0198521	down
BCA vs CK	IFM89_021219	-1.84149	0.0198521	down
BCA vs CK	IFM89_024134	-0.734603	0.0204862	down
BCA vs CK	IFM89_036036	-1.2603	0.0209138	down
BCA vs CK	IFM89_035527	-1.06879	0.0210179	down
BCA vs CK	IFM89_012822	-4.69537	0.0212447	down
BCA vs CK	IFM89_038119	-1.73669	0.0212447	down
BCA vs CK	IFM89_002934	-0.308266	0.0213583	down
BCA vs CK	IFM89_011020	-0.581223	0.0213976	down
BCA vs CK	IFM89_034504	-4.9227	0.0214063	down
BCA vs CK	IFM89_039656	-0.987345	0.0215582	down
BCA vs CK	IFM89_008713	-2.27237	0.0216448	down
BCA vs CK	IFM89_006763	-1.88519	0.0216448	down
BCA vs CK	MSTRG.37748	-4.04267	0.0217643	down
BCA vs CK	IFM89_028223	-0.719373	0.0217643	down
BCA vs CK	IFM89_023256	-0.555839	0.0221507	down
BCA vs CK	IFM89_010751	-0.593696	0.0222831	down
BCA vs CK	IFM89_024821	-2.76566	0.0227192	down
BCA vs CK	IFM89_010877	-1.40304	0.0227433	down
BCA vs CK	MSTRG.23579	-4.93843	0.0228344	down
BCA vs CK	IFM89_038325	-0.964863	0.023009	down
BCA vs CK	IFM89_008591	-2.83801	0.0231386	down
BCA vs CK	IFM89_015690	-4.59003	0.023142	down
BCA vs CK	IFM89_004182	-3.59909	0.0234349	down
BCA vs CK	MSTRG.16936	-4.69448	0.0235631	down
BCA vs CK	IFM89_037912	-3.57053	0.0236223	down
BCA vs CK	MSTRG.20747	-4.86346	0.0237696	down
BCA vs CK	IFM89_012467	-0.846173	0.0237737	down
BCA vs CK	MSTRG.43339	-2.0726	0.0238304	down
BCA vs CK	IFM89_024634	-1.49153	0.0238916	down
BCA vs CK	IFM89_003399	-2.62651	0.0240675	down
BCA vs CK	MSTRG.17101	-2.82718	0.0243023	down
BCA vs CK	IFM89_034389	-3.22521	0.0244207	down
BCA vs CK	IFM89_010597	-2.74576	0.0244207	down
BCA vs CK	IFM89_036729	-1.41263	0.0249626	down
BCA vs CK	IFM89_002611	-0.490157	0.0249627	down
BCA vs CK	IFM89_034513	-2.98657	0.0253301	down
BCA vs CK	MSTRG.20177	-3.59628	0.0260608	down
BCA vs CK	IFM89_033114	-0.824427	0.0266411	down
BCA vs CK	IFM89_038191	-1.88708	0.0273281	down
BCA vs CK	MSTRG.9478	-0.624932	0.0275738	down
BCA vs CK	IFM89_030552	-0.454196	0.0286658	down
BCA vs CK	MSTRG.30512	-4.06456	0.0293578	down
BCA vs CK	IFM89_009009	-3.54139	0.0293578	down
BCA vs CK	IFM89_013568	-1.39694	0.0294765	down
BCA vs CK	IFM89_015725	-0.435412	0.0294765	down
BCA vs CK	MSTRG.13545	-4.76627	0.0295557	down
BCA vs CK	MSTRG.37447	-3.63489	0.0298417	down
BCA vs CK	IFM89_006939	-2.38028	0.0298417	down
BCA vs CK	MSTRG.37588	-2.17431	0.0298986	down
BCA vs CK	IFM89_020362	-0.37252	0.0298986	down
BCA vs CK	IFM89_034765	-1.62926	0.0300717	down
BCA vs CK	IFM89_037023	-2.18365	0.0301817	down
BCA vs CK	MSTRG.2650	-1.99275	0.0301897	down
BCA vs CK	MSTRG.43092	-1.03933	0.0303389	down
BCA vs CK	IFM89_024851	-1.5867	0.0307168	down
BCA vs CK	IFM89_029264	-0.959053	0.0309133	down
BCA vs CK	IFM89_003339	-1.05441	0.0311695	down
BCA vs CK	MSTRG.5139	-4.89149	0.031409	down
BCA vs CK	IFM89_038148	-1.62068	0.0315077	down
BCA vs CK	MSTRG.43287	-2.93704	0.0316894	down
BCA vs CK	IFM89_036545	-2.9826	0.0323954	down
BCA vs CK	IFM89_027662	-1.91984	0.0323954	down
BCA vs CK	IFM89_003833	-2.60809	0.0324636	down
BCA vs CK	IFM89_013380	-1.08181	0.0324636	down
BCA vs CK	IFM89_015279	-1.03139	0.0324636	down
BCA vs CK	IFM89_023631	-3.80593	0.0324779	down
BCA vs CK	IFM89_010356	-1.79675	0.0327419	down
BCA vs CK	IFM89_008574	-2.16899	0.033336	down
BCA vs CK	IFM89_024850	-1.91166	0.033345	down
BCA vs CK	IFM89_035703	-0.650497	0.033345	down
BCA vs CK	IFM89_026889	-3.35345	0.033606	down
BCA vs CK	IFM89_008100	-3.30022	0.0337137	down
BCA vs CK	MSTRG.25266	-3.32835	0.0342007	down
BCA vs CK	IFM89_030562	-2.14529	0.0346369	down
BCA vs CK	MSTRG.37755	-4.4254	0.0347159	down
BCA vs CK	IFM89_039411	-1.311	0.0347159	down
BCA vs CK	IFM89_008518	-0.377066	0.0348101	down
BCA vs CK	IFM89_014199	-0.69006	0.035145	down
BCA vs CK	IFM89_005747	-1.25267	0.0353202	down
BCA vs CK	IFM89_009286	-0.27693	0.0356072	down
BCA vs CK	MSTRG.8360	-3.59424	0.0360062	down
BCA vs CK	IFM89_025506	-4.0423	0.0361791	down
BCA vs CK	IFM89_012829	-3.35869	0.0362575	down
BCA vs CK	IFM89_015341	-1.19587	0.0363919	down
BCA vs CK	IFM89_001332	-3.09581	0.0372327	down
BCA vs CK	IFM89_039062	-2.45625	0.0374692	down
BCA vs CK	IFM89_029703	-4.04113	0.0376413	down
BCA vs CK	IFM89_022987	-3.86832	0.0377564	down
BCA vs CK	IFM89_037780	-0.479285	0.0379061	down
BCA vs CK	IFM89_026377	-1.06412	0.0380052	down
BCA vs CK	MSTRG.10413	-1.3875	0.0384455	down
BCA vs CK	MSTRG.15185	-3.12009	0.0387085	down
BCA vs CK	IFM89_034254	-1.40313	0.039714	down
BCA vs CK	IFM89_019809	-1.93597	0.0397568	down
BCA vs CK	IFM89_026919	-1.84603	0.0397568	down
BCA vs CK	MSTRG.30373	-3.93403	0.0401779	down
BCA vs CK	IFM89_032787	-1.01927	0.0402165	down
BCA vs CK	IFM89_029722	-3.62599	0.0403859	down
BCA vs CK	IFM89_014085	-3.25786	0.0403859	down
BCA vs CK	IFM89_035419	-0.715539	0.0403859	down
BCA vs CK	MSTRG.8359	-3.54855	0.04113	down
BCA vs CK	IFM89_018485	-1.27386	0.04113	down
BCA vs CK	IFM89_037549	-0.756344	0.0415479	down
BCA vs CK	MSTRG.38005	-2.27209	0.0422754	down
BCA vs CK	MSTRG.18500	-2.08914	0.0422754	down
BCA vs CK	MSTRG.31401	-3.59183	0.0434207	down
BCA vs CK	IFM89_024596	-0.414923	0.0437653	down
BCA vs CK	IFM89_019802	-4.35597	0.0438267	down
BCA vs CK	IFM89_038901	-1.69687	0.0438529	down
BCA vs CK	IFM89_018833	-0.727989	0.0439655	down
BCA vs CK	IFM89_001397	-4.3534	0.0448529	down
BCA vs CK	MSTRG.28103	-0.94924	0.0448529	down
BCA vs CK	MSTRG.8615	-0.543949	0.0456128	down
BCA vs CK	IFM89_039049	-0.583224	0.0458385	down
BCA vs CK	MSTRG.21890	-0.75482	0.0459203	down
BCA vs CK	IFM89_017633	-2.50053	0.0460171	down
BCA vs CK	IFM89_017337	-1.18815	0.046227	down
BCA vs CK	IFM89_020519	-2.73647	0.0463626	down
BCA vs CK	IFM89_033564	-0.633127	0.0463653	down
BCA vs CK	IFM89_023854	-0.539972	0.046633	down
BCA vs CK	MSTRG.34599	-4.02796	0.0466832	down
BCA vs CK	IFM89_028591	-2.79098	0.0468194	down
BCA vs CK	IFM89_028724	-1.95921	0.0468194	down
BCA vs CK	IFM89_005779	-1.12585	0.0468691	down
BCA vs CK	IFM89_027977	-0.874561	0.0468691	down
BCA vs CK	MSTRG.22843	-2.00128	0.0469062	down
BCA vs CK	IFM89_015715	-0.308389	0.0470486	down
BCA vs CK	IFM89_037793	-0.394388	0.0474712	down
BCA vs CK	MSTRG.17453	-3.85072	0.0475593	down
BCA vs CK	IFM89_029509	-1.05158	0.0475593	down
BCA vs CK	IFM89_024862	-0.93285	0.047584	down
BCA vs CK	IFM89_010193	-0.85465	0.0475871	down
BCA vs CK	MSTRG.36659	-1.1708	0.0476696	down
BCA vs CK	IFM89_031195	-0.41251	0.0477724	down
BCA vs CK	IFM89_001654	-4.30513	0.0482222	down
BCA vs CK	IFM89_033411	-0.739064	0.0482222	down
BCA vs CK	MSTRG.29825	-2.59994	0.0485165	down
BCA vs CK	MSTRG.16871	-2.29423	0.0485663	down
BCA vs CK	IFM89_009462	-2.33915	0.0485869	down
BCA vs CK	IFM89_018664	-2.19272	0.0485869	down
BCA vs CK	MSTRG.19257	-2.14639	0.0490964	down
BCA vs CK	MSTRG.32182	-1.37053	0.0490964	down
BCA vs CK	IFM89_028388	-0.596283	0.0490964	down
BCA vs CK	IFM89_012246	-0.456649	0.0491575	down
BCA vs CK	MSTRG.28867	-0.650843	0.0494524	down
BCA vs CK	IFM89_039127	-3.80438	0.0496266	down
BCA vs CK	IFM89_026064	-1.90927	0.0496266	down
BCA vs CK	IFM89_024734	-1.58948	0.0496266	down
BCA vs CK	IFM89_004391	-1.44581	0.0496266	down
BCA vs CK	MSTRG.22739	-3.82594	0.0497167	down
BCA vs CK	IFM89_003353	-1.9466	0.0498622	down
BCA vs CK	MSTRG.42703	-1.04269	0.0498779	down
BCAFs vs Fs	MSTRG.42515	0.845425	2.05245e-17	up
BCAFs vs Fs	IFM89_039182	1.49867	1.49211e-14	up
BCAFs vs Fs	IFM89_013165	1.48294	1.49211e-14	up
BCAFs vs Fs	IFM89_013114	1.22814	1.72357e-13	up
BCAFs vs Fs	IFM89_025933	0.968311	1.0949e-12	up
BCAFs vs Fs	IFM89_038076	1.12316	4.91339e-12	up
BCAFs vs Fs	MSTRG.9623	2.29678	1.55119e-11	up
BCAFs vs Fs	IFM89_029644	1.02688	6.26329e-11	up
BCAFs vs Fs	IFM89_037625	2.92795	7.66008e-11	up
BCAFs vs Fs	IFM89_023546	1.00265	2.27067e-10	up
BCAFs vs Fs	IFM89_002742	2.35295	2.63737e-10	up
BCAFs vs Fs	IFM89_016560	1.11977	9.91876e-10	up
BCAFs vs Fs	IFM89_020121	1.37889	1.24566e-09	up
BCAFs vs Fs	IFM89_006619	0.71602	1.42228e-09	up
BCAFs vs Fs	IFM89_028525	0.972962	1.94482e-09	up
BCAFs vs Fs	IFM89_037840	1.04171	2.15801e-09	up
BCAFs vs Fs	IFM89_029024	0.571499	2.15801e-09	up
BCAFs vs Fs	IFM89_036611	0.981037	2.61112e-09	up
BCAFs vs Fs	IFM89_036994	1.87226	3.1548e-09	up
BCAFs vs Fs	IFM89_026278	1.16049	3.1548e-09	up
BCAFs vs Fs	IFM89_021652	2.87779	3.50607e-09	up
BCAFs vs Fs	IFM89_031809	0.586924	4.22941e-09	up
BCAFs vs Fs	IFM89_033295	1.57285	7.13944e-09	up
BCAFs vs Fs	IFM89_038678	1.16507	7.79121e-09	up
BCAFs vs Fs	IFM89_005348	1.02964	1.03708e-08	up
BCAFs vs Fs	MSTRG.42815	0.997681	1.30222e-08	up
BCAFs vs Fs	IFM89_022686	2.41853	1.56597e-08	up
BCAFs vs Fs	IFM89_023002	3.77792	3.23819e-08	up
BCAFs vs Fs	IFM89_034409	1.30216	3.23819e-08	up
BCAFs vs Fs	IFM89_036464	1.02743	3.23819e-08	up
BCAFs vs Fs	IFM89_015281	0.617576	3.23819e-08	up
BCAFs vs Fs	IFM89_001231	1.8053	4.75623e-08	up
BCAFs vs Fs	MSTRG.42115	0.930083	5.07659e-08	up
BCAFs vs Fs	IFM89_007493	1.62994	5.65968e-08	up
BCAFs vs Fs	IFM89_007165	1.18437	5.65968e-08	up
BCAFs vs Fs	IFM89_005528	1.61183	5.79942e-08	up
BCAFs vs Fs	IFM89_036548	1.13434	8.42623e-08	up
BCAFs vs Fs	IFM89_019018	1.76006	8.51578e-08	up
BCAFs vs Fs	IFM89_008715	2.42548	9.74693e-08	up
BCAFs vs Fs	IFM89_020034	1.12587	1.05186e-07	up
BCAFs vs Fs	IFM89_037843	1.30218	1.72154e-07	up
BCAFs vs Fs	MSTRG.35133	1.38059	2.16573e-07	up
BCAFs vs Fs	IFM89_028432	2.16089	2.49307e-07	up
BCAFs vs Fs	MSTRG.40919	1.45189	2.98999e-07	up
BCAFs vs Fs	IFM89_009209	1.84175	3.32911e-07	up
BCAFs vs Fs	MSTRG.2323	2.24742	3.40701e-07	up
BCAFs vs Fs	IFM89_022187	1.39213	3.71043e-07	up
BCAFs vs Fs	IFM89_017944	0.712685	4.11916e-07	up
BCAFs vs Fs	IFM89_032688	0.912577	5.06679e-07	up
BCAFs vs Fs	IFM89_039440	2.33274	5.29571e-07	up
BCAFs vs Fs	IFM89_009210	0.927786	5.29571e-07	up
BCAFs vs Fs	IFM89_026588	1.7472	6.48981e-07	up
BCAFs vs Fs	IFM89_009678	2.76149	6.74174e-07	up
BCAFs vs Fs	IFM89_037543	1.56048	7.4735e-07	up
BCAFs vs Fs	IFM89_003054	1.23534	7.4735e-07	up
BCAFs vs Fs	IFM89_029014	1.23056	8.90395e-07	up
BCAFs vs Fs	IFM89_022128	1.31293	9.21782e-07	up
BCAFs vs Fs	IFM89_033892	1.09438	1.01642e-06	up
BCAFs vs Fs	IFM89_004322	1.81007	1.04157e-06	up
BCAFs vs Fs	IFM89_008316	2.54316	1.05205e-06	up
BCAFs vs Fs	IFM89_037013	2.28475	1.08787e-06	up
BCAFs vs Fs	IFM89_035671	0.991356	1.1365e-06	up
BCAFs vs Fs	IFM89_024277	1.54215	1.25532e-06	up
BCAFs vs Fs	IFM89_007487	0.589056	1.25532e-06	up
BCAFs vs Fs	IFM89_032943	2.65217	1.32356e-06	up
BCAFs vs Fs	IFM89_033609	1.46141	1.34924e-06	up
BCAFs vs Fs	MSTRG.42463	1.04461	1.53685e-06	up
BCAFs vs Fs	MSTRG.15625	3.53841	1.60674e-06	up
BCAFs vs Fs	IFM89_000452	1.22592	1.6249e-06	up
BCAFs vs Fs	IFM89_011732	0.956101	1.6249e-06	up
BCAFs vs Fs	IFM89_000690	0.546788	1.6249e-06	up
BCAFs vs Fs	IFM89_030340	0.690812	1.70796e-06	up
BCAFs vs Fs	IFM89_034120	1.08083	1.98137e-06	up
BCAFs vs Fs	IFM89_002310	1.66083	2.02222e-06	up
BCAFs vs Fs	IFM89_012273	1.09212	2.24084e-06	up
BCAFs vs Fs	IFM89_037517	0.345229	2.42293e-06	up
BCAFs vs Fs	IFM89_001631	2.98693	2.42981e-06	up
BCAFs vs Fs	IFM89_011502	1.14878	2.70515e-06	up
BCAFs vs Fs	IFM89_029065	1.89561	2.99453e-06	up
BCAFs vs Fs	IFM89_013292	1.23871	3.12542e-06	up
BCAFs vs Fs	IFM89_001850	0.782827	3.41169e-06	up
BCAFs vs Fs	IFM89_003052	1.85948	3.41707e-06	up
BCAFs vs Fs	IFM89_012052	0.955871	3.47737e-06	up
BCAFs vs Fs	MSTRG.42076	2.60958	3.59728e-06	up
BCAFs vs Fs	IFM89_013924	1.99743	3.63173e-06	up
BCAFs vs Fs	IFM89_033262	3.276	4.18078e-06	up
BCAFs vs Fs	IFM89_033756	0.918057	4.33901e-06	up
BCAFs vs Fs	IFM89_016693	3.23204	4.36232e-06	up
BCAFs vs Fs	IFM89_032628	2.78166	4.36749e-06	up
BCAFs vs Fs	IFM89_023154	1.25515	4.48521e-06	up
BCAFs vs Fs	IFM89_018085	0.619531	4.51905e-06	up
BCAFs vs Fs	IFM89_015373	1.04717	4.61481e-06	up
BCAFs vs Fs	IFM89_014233	0.749684	4.70265e-06	up
BCAFs vs Fs	IFM89_001510	0.627474	4.70265e-06	up
BCAFs vs Fs	MSTRG.18500	3.53518	4.99294e-06	up
BCAFs vs Fs	IFM89_002271	1.22255	4.99294e-06	up
BCAFs vs Fs	IFM89_015184	2.59723	5.30376e-06	up
BCAFs vs Fs	IFM89_036207	1.65642	5.50071e-06	up
BCAFs vs Fs	IFM89_012319	1.00221	5.77145e-06	up
BCAFs vs Fs	IFM89_025626	2.23311	5.85374e-06	up
BCAFs vs Fs	IFM89_003825	0.89755	5.85374e-06	up
BCAFs vs Fs	IFM89_015689	0.692099	6.28287e-06	up
BCAFs vs Fs	IFM89_034102	1.1046	6.30145e-06	up
BCAFs vs Fs	IFM89_018257	0.564268	6.73318e-06	up
BCAFs vs Fs	IFM89_035125	0.587938	6.86533e-06	up
BCAFs vs Fs	IFM89_036555	1.10366	7.43602e-06	up
BCAFs vs Fs	IFM89_000056	1.40806	7.57875e-06	up
BCAFs vs Fs	IFM89_033797	1.01283	7.57875e-06	up
BCAFs vs Fs	IFM89_013944	0.90923	8.17467e-06	up
BCAFs vs Fs	IFM89_009232	0.729623	8.51071e-06	up
BCAFs vs Fs	IFM89_005354	1.24861	9.84103e-06	up
BCAFs vs Fs	IFM89_030176	1.45621	1.03153e-05	up
BCAFs vs Fs	IFM89_018775	1.01627	1.03153e-05	up
BCAFs vs Fs	IFM89_015540	2.08166	1.03329e-05	up
BCAFs vs Fs	IFM89_025176	0.468574	1.08779e-05	up
BCAFs vs Fs	IFM89_036772	0.578945	1.19872e-05	up
BCAFs vs Fs	IFM89_009235	0.68449	1.24531e-05	up
BCAFs vs Fs	IFM89_019495	0.635579	1.25498e-05	up
BCAFs vs Fs	IFM89_014518	1.661	1.31927e-05	up
BCAFs vs Fs	IFM89_022769	0.866844	1.36588e-05	up
BCAFs vs Fs	IFM89_033411	1.24972	1.44185e-05	up
BCAFs vs Fs	MSTRG.37859	3.43621	1.44592e-05	up
BCAFs vs Fs	IFM89_036686	1.39812	1.47677e-05	up
BCAFs vs Fs	IFM89_016634	0.917199	1.5528e-05	up
BCAFs vs Fs	IFM89_012768	0.693726	1.5528e-05	up
BCAFs vs Fs	IFM89_027014	1.91138	1.69259e-05	up
BCAFs vs Fs	IFM89_014245	1.54233	1.82599e-05	up
BCAFs vs Fs	IFM89_000566	1.42488	2.12497e-05	up
BCAFs vs Fs	IFM89_005960	2.03224	2.16238e-05	up
BCAFs vs Fs	IFM89_029910	0.764294	2.33242e-05	up
BCAFs vs Fs	IFM89_028296	1.63141	2.41165e-05	up
BCAFs vs Fs	IFM89_025126	3.8728	2.42922e-05	up
BCAFs vs Fs	IFM89_007958	0.859402	2.47765e-05	up
BCAFs vs Fs	IFM89_018919	3.60293	2.50209e-05	up
BCAFs vs Fs	IFM89_024031	2.81728	2.50209e-05	up
BCAFs vs Fs	IFM89_031967	1.98374	2.50209e-05	up
BCAFs vs Fs	IFM89_000404	0.78691	2.50209e-05	up
BCAFs vs Fs	IFM89_027941	4.24113	2.55619e-05	up
BCAFs vs Fs	IFM89_002075	3.02947	2.55619e-05	up
BCAFs vs Fs	IFM89_032568	2.47646	2.55619e-05	up
BCAFs vs Fs	MSTRG.13261	1.14211	2.55619e-05	up
BCAFs vs Fs	IFM89_026459	1.77043	2.59592e-05	up
BCAFs vs Fs	IFM89_038306	1.32858	2.60054e-05	up
BCAFs vs Fs	IFM89_031622	0.69203	2.60054e-05	up
BCAFs vs Fs	IFM89_018574	0.841751	2.60878e-05	up
BCAFs vs Fs	IFM89_009671	1.92151	2.62962e-05	up
BCAFs vs Fs	IFM89_001976	0.502378	2.62962e-05	up
BCAFs vs Fs	IFM89_005135	0.400533	2.84994e-05	up
BCAFs vs Fs	IFM89_016466	1.42653	3.06489e-05	up
BCAFs vs Fs	IFM89_034738	0.926201	3.06489e-05	up
BCAFs vs Fs	IFM89_034192	0.700635	3.06489e-05	up
BCAFs vs Fs	IFM89_029162	1.11966	3.11199e-05	up
BCAFs vs Fs	IFM89_039080	2.12962	3.22302e-05	up
BCAFs vs Fs	IFM89_034276	0.968715	3.22302e-05	up
BCAFs vs Fs	IFM89_030432	2.0126	3.45142e-05	up
BCAFs vs Fs	IFM89_000793	0.718081	3.5072e-05	up
BCAFs vs Fs	IFM89_018893	0.721539	3.91783e-05	up
BCAFs vs Fs	IFM89_019248	1.01101	3.94577e-05	up
BCAFs vs Fs	IFM89_021462	0.773503	3.94577e-05	up
BCAFs vs Fs	IFM89_020335	1.12917	4.08348e-05	up
BCAFs vs Fs	IFM89_024283	1.92742	4.15007e-05	up
BCAFs vs Fs	IFM89_023030	0.661965	4.20341e-05	up
BCAFs vs Fs	IFM89_030494	1.35721	4.30374e-05	up
BCAFs vs Fs	IFM89_034160	0.660144	4.34704e-05	up
BCAFs vs Fs	IFM89_024338	0.469985	4.68104e-05	up
BCAFs vs Fs	IFM89_007567	0.714738	4.97755e-05	up
BCAFs vs Fs	IFM89_020129	1.17405	5.01574e-05	up
BCAFs vs Fs	IFM89_018580	0.947155	5.01574e-05	up
BCAFs vs Fs	IFM89_033151	2.76502	5.1966e-05	up
BCAFs vs Fs	IFM89_008561	1.12886	5.1966e-05	up
BCAFs vs Fs	IFM89_038128	1.21818	5.21546e-05	up
BCAFs vs Fs	IFM89_014849	0.639381	5.21546e-05	up
BCAFs vs Fs	IFM89_014600	0.746743	5.293e-05	up
BCAFs vs Fs	IFM89_007362	1.82465	5.35042e-05	up
BCAFs vs Fs	IFM89_035211	0.683939	5.37993e-05	up
BCAFs vs Fs	IFM89_039773	0.426459	5.49788e-05	up
BCAFs vs Fs	IFM89_001262	0.907905	5.60532e-05	up
BCAFs vs Fs	IFM89_010169	3.21592	5.63785e-05	up
BCAFs vs Fs	IFM89_001005	1.83482	5.70468e-05	up
BCAFs vs Fs	IFM89_005691	1.40778	5.70468e-05	up
BCAFs vs Fs	IFM89_013361	0.703519	5.72738e-05	up
BCAFs vs Fs	IFM89_015251	0.781319	5.78634e-05	up
BCAFs vs Fs	IFM89_020205	2.02477	5.85842e-05	up
BCAFs vs Fs	IFM89_020800	5.69598	5.91607e-05	up
BCAFs vs Fs	IFM89_001567	2.34839	5.91607e-05	up
BCAFs vs Fs	IFM89_034449	1.25235	5.91607e-05	up
BCAFs vs Fs	MSTRG.42288	0.89966	5.91607e-05	up
BCAFs vs Fs	IFM89_008344	2.93468	5.92158e-05	up
BCAFs vs Fs	IFM89_029915	0.408524	5.98728e-05	up
BCAFs vs Fs	IFM89_007117	1.91238	6.07807e-05	up
BCAFs vs Fs	IFM89_035664	1.48305	6.27177e-05	up
BCAFs vs Fs	IFM89_021092	2.95215	6.47235e-05	up
BCAFs vs Fs	IFM89_011831	1.06932	6.47235e-05	up
BCAFs vs Fs	IFM89_009714	0.550057	6.62395e-05	up
BCAFs vs Fs	IFM89_021490	2.12264	6.72658e-05	up
BCAFs vs Fs	IFM89_036247	1.74084	6.81084e-05	up
BCAFs vs Fs	IFM89_037175	0.489903	6.86698e-05	up
BCAFs vs Fs	IFM89_016204	2.05389	7.17376e-05	up
BCAFs vs Fs	IFM89_020257	1.90992	7.17376e-05	up
BCAFs vs Fs	IFM89_000898	1.19229	7.59353e-05	up
BCAFs vs Fs	MSTRG.42251	0.690015	7.59353e-05	up
BCAFs vs Fs	IFM89_019839	1.24485	7.9478e-05	up
BCAFs vs Fs	IFM89_003119	0.449737	7.97956e-05	up
BCAFs vs Fs	IFM89_021723	0.508171	8.10927e-05	up
BCAFs vs Fs	IFM89_029164	1.94064	8.18942e-05	up
BCAFs vs Fs	IFM89_014573	2.97707	8.25872e-05	up
BCAFs vs Fs	IFM89_025697	3.85309	8.64449e-05	up
BCAFs vs Fs	MSTRG.4356	2.47193	8.64449e-05	up
BCAFs vs Fs	IFM89_032870	0.794359	8.70835e-05	up
BCAFs vs Fs	IFM89_025161	1.97925	8.96034e-05	up
BCAFs vs Fs	IFM89_029664	0.675889	8.9685e-05	up
BCAFs vs Fs	MSTRG.467	1.44431	9.15725e-05	up
BCAFs vs Fs	IFM89_024129	1.79612	9.69436e-05	up
BCAFs vs Fs	IFM89_028376	1.14959	9.90767e-05	up
BCAFs vs Fs	IFM89_026609	1.84318	0.000103123	up
BCAFs vs Fs	IFM89_011447	3.67947	0.000103346	up
BCAFs vs Fs	IFM89_016961	0.534009	0.00010503	up
BCAFs vs Fs	IFM89_010116	4.23183	0.000106449	up
BCAFs vs Fs	MSTRG.10549	3.83067	0.000106449	up
BCAFs vs Fs	IFM89_028287	1.27053	0.000107008	up
BCAFs vs Fs	IFM89_010768	1.7333	0.000107697	up
BCAFs vs Fs	IFM89_005559	0.788231	0.000109251	up
BCAFs vs Fs	IFM89_019960	2.22275	0.000109307	up
BCAFs vs Fs	IFM89_022403	1.51796	0.000110331	up
BCAFs vs Fs	IFM89_025967	1.48053	0.000110515	up
BCAFs vs Fs	IFM89_015236	0.996345	0.000110515	up
BCAFs vs Fs	IFM89_000682	2.70031	0.000113996	up
BCAFs vs Fs	IFM89_033118	0.621311	0.000121545	up
BCAFs vs Fs	IFM89_036995	0.942824	0.000127442	up
BCAFs vs Fs	MSTRG.42334	0.714951	0.000127442	up
BCAFs vs Fs	IFM89_002123	1.59155	0.000129419	up
BCAFs vs Fs	IFM89_009544	1.17379	0.000132457	up
BCAFs vs Fs	IFM89_006172	1.2647	0.000140141	up
BCAFs vs Fs	IFM89_008682	1.48445	0.000141874	up
BCAFs vs Fs	MSTRG.10031	5.21406	0.00014207	up
BCAFs vs Fs	IFM89_039882	0.771966	0.000146042	up
BCAFs vs Fs	IFM89_034129	1.14172	0.000147819	up
BCAFs vs Fs	IFM89_020574	1.36553	0.000148868	up
BCAFs vs Fs	IFM89_023588	0.783847	0.000150419	up
BCAFs vs Fs	MSTRG.14989	3.94854	0.000152827	up
BCAFs vs Fs	IFM89_029135	1.19788	0.0001553	up
BCAFs vs Fs	MSTRG.26797	5.42241	0.00015558	up
BCAFs vs Fs	IFM89_019346	0.711098	0.00015558	up
BCAFs vs Fs	IFM89_024350	0.968883	0.000156262	up
BCAFs vs Fs	IFM89_011729	0.656294	0.000160673	up
BCAFs vs Fs	IFM89_005237	1.47895	0.00016374	up
BCAFs vs Fs	IFM89_010706	1.18526	0.000165618	up
BCAFs vs Fs	IFM89_030957	1.7065	0.000166025	up
BCAFs vs Fs	IFM89_007171	1.50849	0.000166025	up
BCAFs vs Fs	IFM89_019316	0.619162	0.000166025	up
BCAFs vs Fs	IFM89_022473	1.40825	0.00016845	up
BCAFs vs Fs	IFM89_010982	1.05428	0.000171025	up
BCAFs vs Fs	IFM89_012390	2.05105	0.000171149	up
BCAFs vs Fs	IFM89_001368	0.737993	0.000176755	up
BCAFs vs Fs	IFM89_028594	0.755296	0.000181821	up
BCAFs vs Fs	MSTRG.42646	2.06435	0.000184091	up
BCAFs vs Fs	IFM89_031657	1.03661	0.000184091	up
BCAFs vs Fs	IFM89_037050	0.653265	0.000186118	up
BCAFs vs Fs	IFM89_002180	0.447209	0.000187093	up
BCAFs vs Fs	IFM89_027149	0.352031	0.000188907	up
BCAFs vs Fs	IFM89_032694	1.66614	0.000189003	up
BCAFs vs Fs	IFM89_014811	1.38499	0.000190734	up
BCAFs vs Fs	IFM89_003847	2.22073	0.000191002	up
BCAFs vs Fs	IFM89_003051	1.54779	0.000191002	up
BCAFs vs Fs	IFM89_005182	0.674831	0.000199775	up
BCAFs vs Fs	IFM89_010036	2.39406	0.000201994	up
BCAFs vs Fs	IFM89_030236	2.90619	0.000202592	up
BCAFs vs Fs	IFM89_031889	1.78298	0.000203971	up
BCAFs vs Fs	MSTRG.43191	6.72931	0.000204567	up
BCAFs vs Fs	MSTRG.22575	5.58971	0.00020855	up
[truncated: 10,336 more rows]

## Sheet: Table. S5
Table S5. The KEGG enrichment analyses of differentially expressed genes (DEGs) .
Pairwise comparison	Term Name	enrichmentScore	p-value	core_enrichment
Fs vs CK	Motor proteins	0.859689	0.00196078	IFM89_010856/IFM89_010856/IFM89_010856/IFM89_010856/IFM89_010856/IFM89_031766/IFM89_023458,IFM89_001356,IFM89_030244,IFM89_021547	0
Fs vs CK	Cell cycle	-0.613662	0.0019685	IFM89_020361,IFM89_017967/ORC5,IFM89_028817/IFM89_020139,IFM89_017694/IFM89_009502/IFM89_034197,IFM89_029725/IFM89_031445/IFM89_015144,IFM89_038717,IFM89_015185/APC11,IFM89_031093/IFM89_035004/IFM89_030921,IFM89_030920/IFM89_020766/IFM89_028348/IFM89_002856/CDKB,MAPK3,CDK6/CDKB,MAPK3,CDK6/CDKB,MAPK3,CDK6/IFM89_037638,IFM89_018903/IFM89_023526/IFM89_008004,IFM89_023599,IFM89_021557/IFM89_030369/IF…	0
Fs vs CK	Fatty acid elongation	-0.862258	0.00199601	IFM89_037701,IFM89_037702/IFM89_008059,IFM89_005886/IFM89_000064,IFM89_025725,IFM89_023442,IFM89_034534	0
Fs vs CK	Sesquiterpenoid and triterpenoid biosynthesis	0.875303	0.00201207	IFM89_001459,IFM89_010184/IFM89_001459,IFM89_010184/IFM89_001459,IFM89_010184/IFM89_001459,IFM89_010184/IFM89_001459,IFM89_010184/IFM89_001459,IFM89_010184/IFM89_001459,IFM89_010184/IFM89_001459,IFM89_010184/IFM89_001459,IFM89_010184/IFM89_025680,IFM89_025691	0
Fs vs CK	Ribosome	-0.435495	0.00212314	IFM89_036628,IFM89_037690/IFM89_026117,IFM89_000844,IFM89_039688,IFM89_031520,IFM89_006305,IFM89_011663/IFM89_028274,IFM89_030981,IFM89_012737,RPS14,IFM89_023718,IFM89_014065/IFM89_005874,IFM89_005882,IFM89_036407/IFM89_020363/IFM89_031051,IFM89_029708,IFM89_026081/IFM89_013147,IFM89_003355,IFM89_016132,IFM89_016130/IFM89_029847,IFM89_036189,IFM89_037896/IFM89_009918,IFM89_032624,IFM89_009421/rpl…	0
Fs vs CK	Flavone and flavonol biosynthesis	0.901192	0.00408998	IFM89_035544,IFM89_035545,IFM89_027163,IFM89_027164/IFM89_035544,IFM89_035545,IFM89_027163,IFM89_027164/IFM89_035544,IFM89_035545,IFM89_027163,IFM89_027164/IFM89_029407/IFM89_008125,IFM89_008137	0
Fs vs CK	Fatty acid metabolism	-0.628197	0.0060241	IFM89_030077,IFM89_026745,IFM89_005918,IFM89_006951,IFM89_033375/LACS7,IFM89_009775,IFM89_002699,IFM89_023642,IFM89_016772,IFM89_008250,IFM89_030115,IFM89_029625,IFM89_008621,IFM89_000069/ACX5,IFM89_030610,IFM89_030609,IFM89_034635,IFM89_007868,IFM89_011281,IFM89_030572/K03921/IFM89_009304,IFM89_030476,IFM89_007847,IFM89_026201,IFM89_018122,IFM89_027432,IFM89_018121,IFM89_009303,IFM89_031535/IFM8…	0
Fs vs CK	DNA replication	-0.593473	0.00787402	IFM89_034197,IFM89_029725/IFM89_019365/IFM89_035004/IFM89_037638,IFM89_018903/IFM89_026922/IFM89_008004,IFM89_023599,IFM89_021557/IFM89_030369/MCM6,IFM89_004543,IFM89_021567	0
Fs vs CK	Photosynthesis	0.594746	0.00984252	IFM89_001704/IFM89_017220/IFM89_008045/IFM89_010219,IFM89_032559,IFM89_005224,IFM89_008511/IFM89_023082/IFM89_017613/IFM89_020920,IFM89_038101/IFM89_010917/IFM89_039988,IFM89_001324/IFM89_028704,IFM89_030635/IFM89_011849,IFM89_008715,IFM89_007765,IFM89_035729/IFM89_018247/IFM89_004428	0
Fs vs CK	Fatty acid biosynthesis	-0.6595	0.0116732	LACS7,IFM89_009775,IFM89_002699,IFM89_023642,IFM89_016772,IFM89_008250,IFM89_030115,IFM89_029625,IFM89_008621,IFM89_000069/K03921/IFM89_009304,IFM89_030476,IFM89_007847,IFM89_026201,IFM89_018122,IFM89_027432,IFM89_018121,IFM89_009303,IFM89_031535/IFM89_015985,IFM89_030368,IFM89_000118,IFM89_039317,IFM89_021625,KAS1,IFM89_018677,IFM89_022193/IFM89_013069/IFM89_008073/IFM89_011197,IFM89_004187,IFM8…	0
Fs vs CK	Cysteine and methionine metabolism	-0.477738	0.0270833	IFM89_022594,IFM89_020266,IFM89_000978,IFM89_011511/IFM89_011976,IFM89_007712,IFM89_001752,IFM89_010212,IFM89_034256,IFM89_010214,IFM89_031127,IFM89_001069,IFM89_008052,IFM89_001071,IFM89_023271,IFM89_019564,IFM89_003531,IFM89_023611/IFM89_005216/IFM89_008013,IFM89_018691/IFM89_028450,IFM89_010616,IFM89_017046/IFM89_038458,ASP1,IFM89_018547,ALN,ASP1,IFM89_022960/IFM89_024290,IFM89_014217,IFM89_00…	0
Fs vs CK	Biosynthesis of various plant secondary metabolites	-0.614447	0.029703	IFM89_030782,IFM89_006463,IFM89_006462,IFM89_016111/IFM89_031758,IFM89_033569/IFM89_012401,IFM89_012394,IFM89_012392,IFM89_037351,IFM89_012395,IFM89_007902,IFM89_012399,IFM89_007904,IFM89_012402,IFM89_028023,IFM89_010137,IFM89_007905,IFM89_027470,IFM89_007903,IFM89_009141/IFM89_005991	0
Fs vs CK	Amino sugar and nucleotide sugar metabolism	-0.503732	0.0305499	IFM89_016753,IFM89_016747/IFM89_036800,IFM89_033122/IFM89_018751,IFM89_029630/IFM89_027366,IFM89_021024,IFM89_035477,IFM89_023401,IFM89_005116,IFM89_014897,IFM89_039603,IFM89_034473/IFM89_004375,IFM89_007400,IFM89_027067,IFM89_004376,IFM89_015250,IFM89_022541,IFM89_015253,IFM89_007401/IFM89_028402/IFM89_037658,IFM89_038728,IFM89_032910,IFM89_037659,IFM89_002258,IFM89_030651,IFM89_030292,IFM89_002…	0
BCA vs CK	Photosynthesis	0.7608	0.00158228	IFM89_010917/IFM89_001704/IFM89_008045/PSAL/IFM89_001324,IFM89_039988/IFM89_005224,IFM89_010219,IFM89_032559,IFM89_008511/IFM89_020920,IFM89_038101/IFM89_017220/IFM89_008715,IFM89_011849,IFM89_035729,IFM89_007765/IFM89_018936,IFM89_002048,IFM89_017626,IFM89_038625,IFM89_012714/IFM89_023082/IFM89_035327,IFM89_006204,IFM89_009299,IFM89_030630,IFM89_033352,IFM89_036539/IFM89_005095/IFM89_014012,IFM8…	0
BCA vs CK	Sesquiterpenoid and triterpenoid biosynthesis	0.880993	0.00165289	IFM89_001459,IFM89_010184/IFM89_001459,IFM89_010184/IFM89_001459,IFM89_010184/IFM89_001459,IFM89_010184/IFM89_001459,IFM89_010184/IFM89_001459,IFM89_010184/IFM89_001459,IFM89_010184/IFM89_001459,IFM89_010184/IFM89_001459,IFM89_010184	0
BCA vs CK	Flavone and flavonol biosynthesis	0.907529	0.0018018	IFM89_035544,IFM89_035545,IFM89_027163,IFM89_027164/IFM89_035544,IFM89_035545,IFM89_027163,IFM89_027164/IFM89_035544,IFM89_035545,IFM89_027163,IFM89_027164/IFM89_008125,IFM89_008137	0
BCA vs CK	Isoflavonoid biosynthesis	-0.908971	0.002331	IFM89_001025,IFM89_007840,IFM89_001020,IFM89_001023/IFM89_001025,IFM89_007840,IFM89_001020,IFM89_001023/IFM89_005056,IFM89_005057,IFM89_007908,IFM89_014072,IFM89_014066,IFM89_029222,IFM89_014067,IFM89_005063/IFM89_017236,IFM89_017241,IFM89_017239,IFM89_008462,IFM89_010179	0
BCA vs CK	Diterpenoid biosynthesis	-0.804798	0.00251256	IFM89_012596/IFM89_036442,IFM89_036443,IFM89_025044,IFM89_028003,IFM89_010532,IFM89_025440,IFM89_027815,IFM89_004975/IFM89_018485,IFM89_037549,CPS1,IFM89_002657,IFM89_030143,IFM89_021301,IFM89_006056,IFM89_004188,IFM89_035951,IFM89_021297,IFM89_024737,IFM89_014643,IFM89_002658,IFM89_005884,IFM89_005885,IFM89_020428,IFM89_000933,IFM89_017376/IFM89_018485,IFM89_037549,CPS1,IFM89_002657,IFM89_030143…	0
BCA vs CK	Cutin, suberine and wax biosynthesis	-0.829571	0.00253807	IFM89_015456/IFM89_031482/IFM89_005274,IFM89_018379,IFM89_020575,IFM89_014317,IFM89_004090,IFM89_020578,IFM89_039521,IFM89_039523,IFM89_005713/IFM89_018453,IFM89_022694,IFM89_012554,IFM89_018454,IFM89_022900/IFM89_038539,IFM89_027714,IFM89_007738,IFM89_023177,IFM89_037288/IFM89_038191,IFM89_021683,IFM89_036644/IFM89_038677,IFM89_038675	0
BCA vs CK	Monoterpenoid biosynthesis	-0.79814	0.00253807	IFM89_026197,IFM89_025302/IFM89_008574,IFM89_015818,IFM89_019412,IFM89_025788,IFM89_003715,IFM89_003719,IFM89_003714,IFM89_008583,IFM89_015856,IFM89_008568,IFM89_020004,IFM89_003718,IFM89_002888,IFM89_003716,IFM89_007480,IFM89_012898,IFM89_015789,IFM89_019768,IFM89_019408,IFM89_033624,IFM89_006140,IFM89_013554,IFM89_026986,IFM89_015816/IFM89_029762,IFM89_005841,IFM89_007532,IFM89_008677,IFM89_013…	0
BCA vs CK	Cell cycle	-0.509631	0.00285714	IFM89_012157,IFM89_027946,SMC3,IFM89_018632/IFM89_009349,IFM89_020374,IFM89_020375,IFM89_009352,IFM89_020376/IFM89_038717,IFM89_015144,IFM89_015185/IFM89_000418,IFM89_000416,IFM89_011893,IFM89_009819,IFM89_000504,IFM89_000505,IFM89_026231,IFM89_009821,IFM89_020255,IFM89_012947,IFM89_038453,IFM89_026198/IFM89_005859,IFM89_018977,IFM89_028730/IFM89_031445/IFM89_037638,IFM89_018903/IFM89_020361,IFM8…	0
BCA vs CK	Arginine biosynthesis	0.674347	0.00473934	IFM89_025126,IFM89_037673,IFM89_037334/NAGK,IFM89_001771/IFM89_028630/ALN,ASP1,IFM89_014862/IFM89_016205,IFM89_030906,IFM89_009356/IFM89_034301,IFM89_020134/IFM89_038377/IFM89_023083,IFM89_032419,IFM89_002884,IFM89_002878,IFM89_032416,IFM89_014763,IFM89_025657/ASP1,ALN,ASP1,IFM89_022960,IFM89_018547,IFM89_038458/IFM89_014411,IFM89_020389,IFM89_035668/IFM89_022777/IFM89_000981,IFM89_039710,IFM89_0…	0
BCA vs CK	Valine, leucine and isoleucine degradation	0.656943	0.00632911	IFM89_039080/IFM89_002224/IFM89_002224/IFM89_028562,IFM89_012070/IFM89_030054/IFM89_011831/IFM89_017625	0
BCA vs CK	Carotenoid biosynthesis	-0.629035	0.00826446	IFM89_032964,CCD7,IFM89_001646,IFM89_003162,IFM89_002113,IFM89_033573/IFM89_016261/IFM89_011570/IFM89_025028/IFM89_011665/PSY1,IFM89_028791,IFM89_021865,IFM89_008212,PSY3,PSY1,ADG2A,IFM89_017595/IFM89_024299/IFM89_024299/IFM89_022159/IFM89_001362	0
BCA vs CK	Nitrogen metabolism	0.722193	0.00826446	IFM89_031944/IFM89_025126,IFM89_037673,IFM89_037334/IFM89_024427/ALN,ASP1,IFM89_014862/IFM89_029500,IFM89_008597,IFM89_029502,IFM89_021533,CYN	0
BCA vs CK	DNA replication	-0.540877	0.0130208	IFM89_006452/IFM89_037638,IFM89_018903/IFM89_030369/IFM89_007806,IFM89_013267,IFM89_005673/IFM89_026922/IFM89_008004,IFM89_023599,IFM89_021557/MCM6,IFM89_004543,IFM89_021567	0
BCA vs CK	Motor proteins	-0.552145	0.0185185	IFM89_037698,IFM89_013225,IFM89_023410,IFM89_003912,IFM89_028237,IFM89_000555,IFM89_017331,IFM89_017363,IFM89_002710,IFM89_021448,IFM89_004408,IFM89_025093,IFM89_035696,IFM89_016946,IFM89_000556,IFM89_035678,IFM89_032547,IFM89_036661/IFM89_013238,IFM89_013242,IFM89_002714,IFM89_028967,IFM89_012575,IFM89_005720,IFM89_014907,IFM89_028758,IFM89_014909,IFM89_006665,IFM89_002555,IFM89_034705,IFM89_028…	0
BCA vs CK	MAPK signaling pathway - plant	0.479414	0.0361068	IFM89_017969,IFM89_038323/IFM89_002727/IFM89_028284,IFM89_004530,IFM89_028285,IFM89_004531,IFM89_004532/IFM89_035280/IFM89_039422,IFM89_038526/IFM89_028819,IFM89_011204/IFM89_013379,IFM89_000347/IFM89_004303/IFM89_029869,IFM89_029868/IFM89_036548,IFM89_003119/IFM89_017542/IFM89_011562,IFM89_039156/IFM89_026865,IFM89_039251,IFM89_021956,IFM89_012166,IFM89_021964	0
BCA vs CK	Chloroalkane and chloroalkene degradation	-0.826054	0.0377358	IFM89_012963,IFM89_012021,IFM89_021429,IFM89_039389,IFM89_039249,IFM89_024389,IFM89_024388,IFM89_012965,IFM89_004264,IFM89_037637,IFM89_039245,IFM89_039256,IFM89_015118,IFM89_012316/IFM89_037995,IFM89_023944,IFM89_008148,IFM89_014719,IFM89_037975,IFM89_038962,IFM89_037979,IFM89_009386,IFM89_037996/IFM89_017477,IFM89_022294,IFM89_022295,IFM89_017476	0
BCA vs CK	Flavonoid biosynthesis	0.63714	0.044702	IFM89_021150,IFM89_021151/IFM89_020951/IFM89_024985,IFM89_033988,IFM89_030396,IFM89_010108,IFM89_024989,IFM89_024974/IFM89_005741,IFM89_005742/IFM89_008125,IFM89_008137/IFM89_008421	0
BCAFs vs Fs	Photosynthesis	0.773704	0.00161551	K02109/K02111/K02112/K02113/K02114/K02635/K02636/K02638/K02639/K02641/K02689/K02690/K02692/K02695/K02696/K02698/K02699/K02703/K02704/K02705/K02706/K02716/K03542/K08901/K08905	0
BCAFs vs Fs	Sesquiterpenoid and triterpenoid biosynthesis	-0.766762	0.00235294	K00511/K00801/K15891	0
BCAFs vs Fs	Diterpenoid biosynthesis	-0.772161	0.00236967	K13070	0
BCAFs vs Fs	Motor proteins	-0.767315	0.00259067	K10352/K10365/K10395/K10405/K10418	0
BCAFs vs Fs	Valine, leucine and isoleucine degradation	0.722797	0.00330579	K00020/K00166/K00167/K00253/K00626/K00826/K00827/K01965/K01966/K01968/K01969/K07513/K09699/K14085/K18660	0
BCAFs vs Fs	Monoterpenoid biosynthesis	-0.7259	0.00704225	K15095	0
BCAFs vs Fs	Sphingolipid signaling pathway	-0.635269	0.00990099	K00654/K01634/K03456/K04354/K04382/K04714/K04718/K06276/K11583/K11584	0
BCAFs vs Fs	MAPK signaling pathway - plant	0.585454	0.0111288	K02183/K03781/K13413/K13414/K13420/K13422/K13424/K13425/K13449/K14497/K14498/K14509/K14510/K14513/K14514/K14515/K14516/K17686/K20535/K20536/K20537/K20547/K20553/K20557/K20599/K20605/K20606/K20607/K20714/K20716/K20717/K20725/K20727	0
BCAFs vs Fs	Biosynthesis of various plant secondary metabolites	-0.667571	0.0117647	K05349/K13832/K14271/K14329	0
BCAFs vs Fs	Base excision repair	-0.532549	0.0130548	K01247/K02324/K02330/K03505/K03512/K03652/K07759/K10563/K10747/K10754/K10755/K10801	0
BCAFs vs Fs	Propanoate metabolism	0.667741	0.0153846	K00016/K00166/K00167/K00232/K01578/K01637/K01895/K01899/K01900/K01963/K01965/K01966/K09699/K11262	0
BCAFs vs Fs	Alanine, aspartate and glutamate metabolism	0.615236	0.0212418	K00261/K00264/K00609/K00764/K00814/K00827/K00830/K01580/K01755/K01756/K01939/K01940/K01953/K13051/K14272/K14454/K14455/K16871/K17761	0
BCAFs vs Fs	Glyoxylate and dicarboxylate metabolism	0.57638	0.0212418	K00026/K00122/K00284/K00605/K00626/K00827/K00830/K01433/K01601/K01602/K01637/K01647/K01895/K01965/K01966/K03781/K11517/K14272/K15918/K17865/K19269	0
BCAFs vs Fs	Ribosome	0.418573	0.0230548	K02863/K02865/K02866/K02871/K02873/K02874/K02875/K02876/K02877/K02878/K02880/K02881/K02882/K02883/K02885/K02889/K02895/K02899/K02901/K02902/K02903/K02904/K02906/K02910/K02911/K02913/K02916/K02917/K02918/K02919/K02920/K02921/K02925/K02926/K02929/K02930/K02931/K02932/K02933/K02934/K02936/K02937/K02942/K02943/K02945/K02947/K02949/K02950/K02951/K02952/K02956/K02957/K02959/K02961/K02962/K02964/K02966/…	0
BCAFs vs Fs	Isoflavonoid biosynthesis	-0.756127	0.0307692	K13258/K13260/K13264	0
BCAFs vs Fs	Plant hormone signal transduction	0.500813	0.0377953	K00924/K02183/K12126/K13412/K13413/K13415/K13422/K13449/K13463/K13464/K14431/K14432/K14484/K14485/K14486/K14489/K14491/K14493/K14495/K14497/K14498/K14500/K14503/K14504/K14509/K14510/K14513/K14514/K14515/K14516/K14517/K16189/K20536	0
BCAFs vs Fs	Porphyrin metabolism	0.527609	0.0392157	K00218/K00231/K00522/K01599/K01698/K01719/K01749/K01772/K01845/K02257/K02303/K02492/K03403/K03404/K03428/K03794/K04035/K10960/K13071/K13545/K13606/K18010/K19073/K22013	0
BCAFs vs Fs	Carotenoid biosynthesis	-0.564405	0.0445545	K06443/K06444/K09835/K09838/K09840/K09842/K09843/K15746/K15747/K17912	0

## Sheet: Table. S6
Table S6. Colony diameter of different treatment groups
Group	Colony diameter（mm）
	3 days	7 days
CK	43.40±1.67	79.40±0.89
1.0mmol/L	42.00±1.41	79.00±1.00
2.0mmol/L	43.80±2.59	79.60±1.67
3.0mmol/L	42.40±1.67	73.00±1.58
5.0mmol/L	42.80±0.84	71.80±0.84
8.0mmol/L	42.60±0.89	70.80±1.30
3d
3d
3d
3d
3d
3d
7d
7d
7d
7d
7d
7d
